# Supplementary material for: Inflation of tumor mutation burden by tumor-only sequencing in under-represented groups
Source: PubMed Central journal article supplement (PMC7979755; doi:10.1038/s41698-021-00164-5), 2021-03-19
Supplement: 41698_2021_164_MOESM1_ESM.pdf [file 41698_2021_164_MOESM1_ESM.pdf]

## Normality of Tumor Mutational Burden Numbers

Non-somatic mutations filtered using all variants from 1000G and ExAC

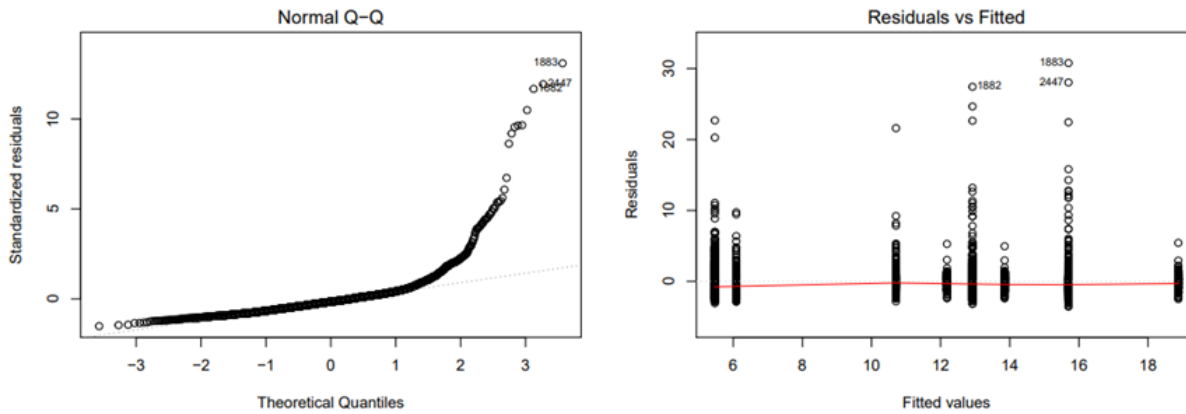

Non-somatic mutations filtered using AFR/EUR variants from 1000G and AFR/NEF variants from ExAC

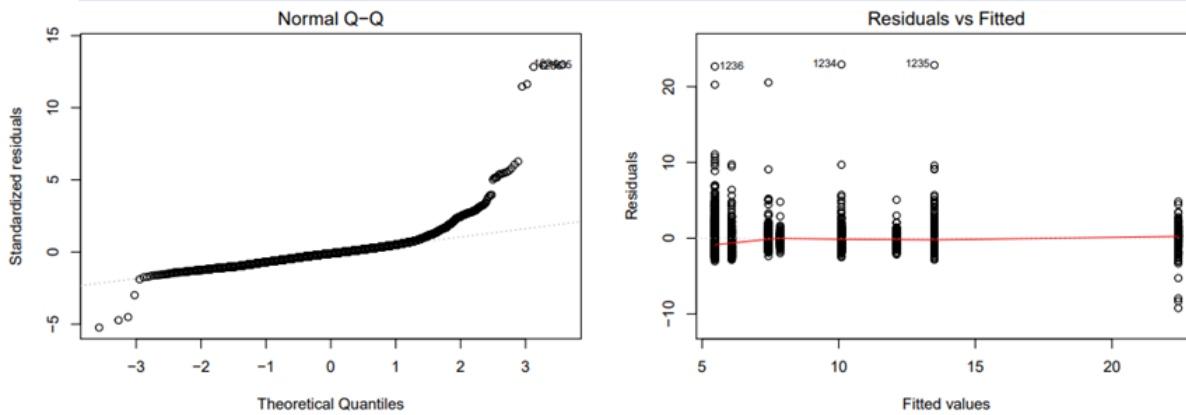

**Supplementary Figure 1:** Q-Q plot and Residual plot of Tumor Mutational Burden (TMB) values, as calculated as “number of protein-altering somatic mutations per Mb of coding regions”. All TMB values from four different filtering criteria were included: (1) excluding variants in patient-matched germline exome; (2) excluding variants with minor allele frequency (MAF)  $\geq 1\%$  in 1000G or ExAC DBs; (3) excluding variants with MAF  $\geq 0.1\%$  in 1000G or ExAC; and (4) excluding all variants reported by 1000G or ExAC. The upper panel figures illustrate the TMB normality when non-somatic mutations were filtered using germline or all variants in 1000G/ExAC. The lower panel figures used TMB values when non-somatic mutations were filtered using germline or race-specific variants in 1000G/ExAC

## Impact of Variant Filtering Criteria on TMB

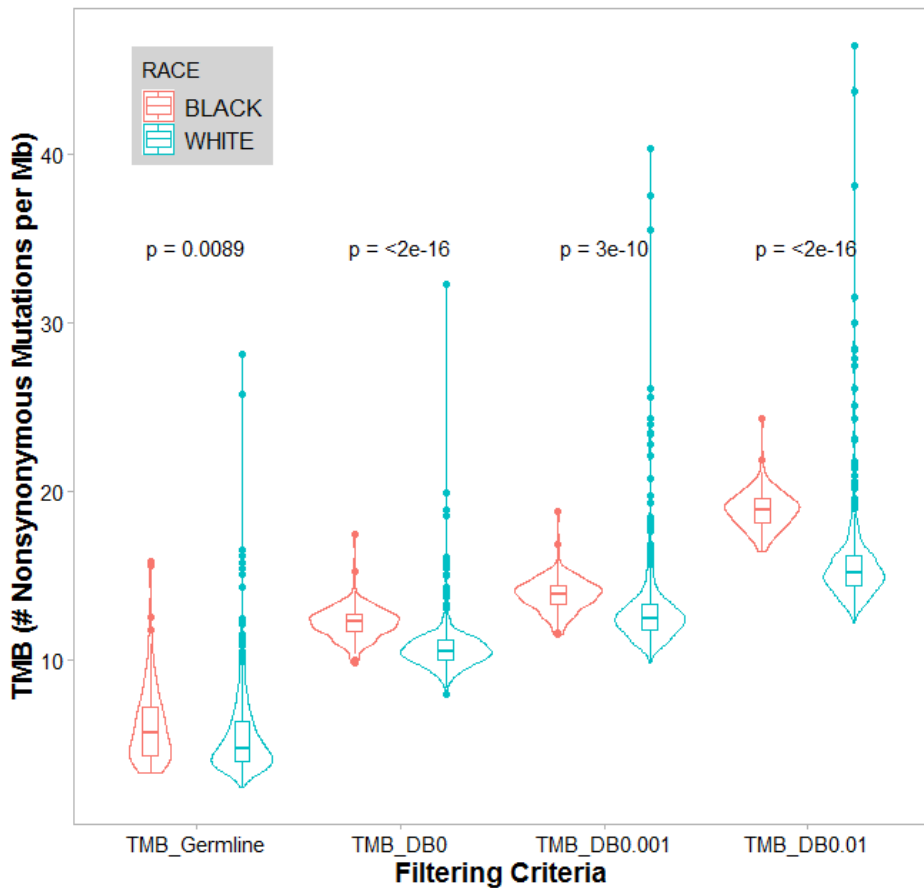

**Supplementary Figure 2: Violin and Box Plot of Tumor Mutational Burdens (TMB), and Comparisons of TMBs Calculated from All Protein-Coding Genes in Black and White Patients from Four Variant Filtering Criteria.** Note that variant MAF of AFR (African) population from 1000G and ExAC were used to filter variants in Black individuals, while MAF of EUR (European) population in 1000G and NFE (Non-Finnish European) in ExAC were used to filter variants in White patients. The TMB values were calculated as number of nonsynonymous mutations per Mb of coding regions. Four criteria were applied to identify patient-specific somatic mutations: (1) TMB\_Germline: excluding variants in patient-matched germline exome; (2) TMB\_DB0: excluding all variants reported by 1000G or ExAC; (3) TMB\_DB0.001: excluding variants with MAF  $\geq 0.1\%$  in 1000G or ExAC; and (4) TMB\_DB0.01: excluding variants with minor allele frequency (MAF)  $\geq 1\%$  in 1000G or ExAC DBs. The violin and box plots in red are TMB values from Black patients, and blue are from White Patients. Note that the 1000 Genome Project uses self-reported race, and ExAC's race definitions are computed from individual genotypes.

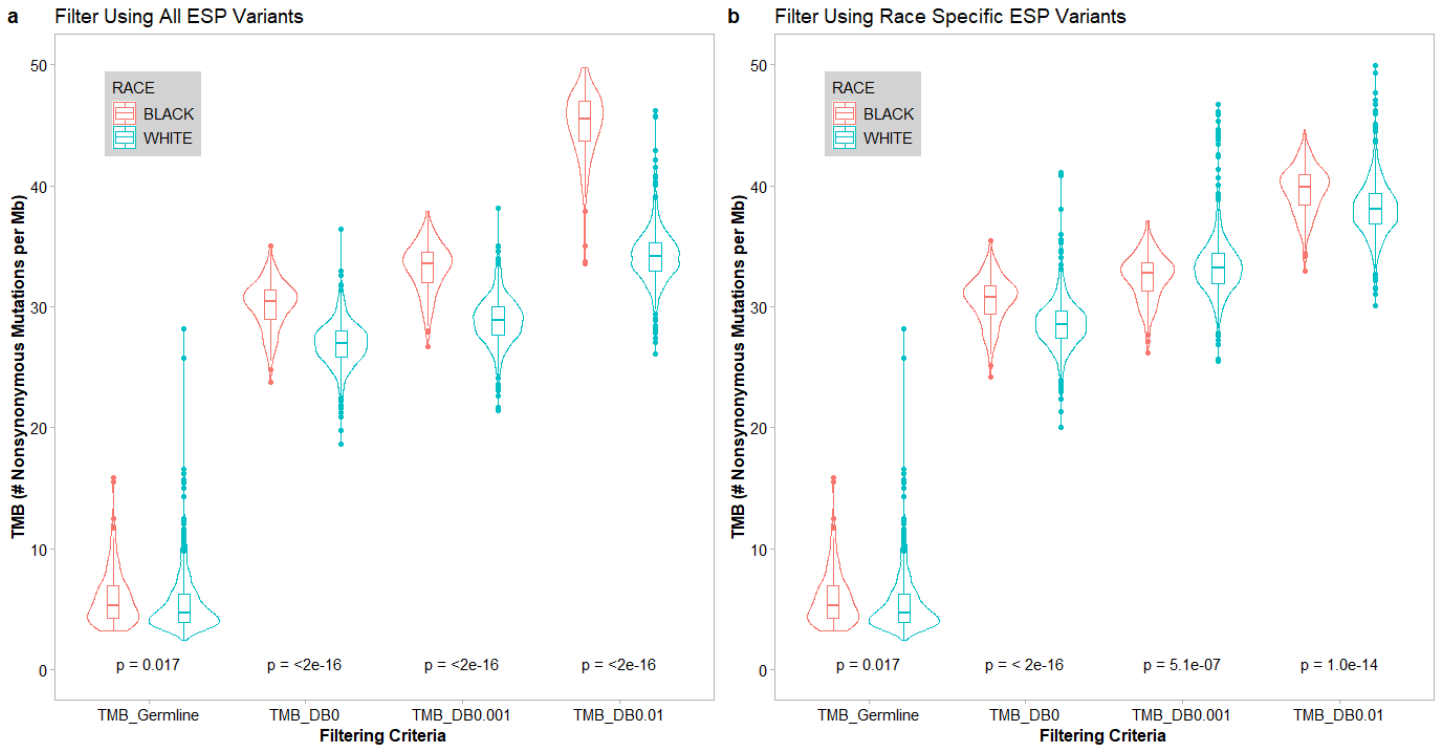

**Supplementary Figure 3: Violin and Box Plot of Tumor Mutational Burdens (TMB), and Comparisons of TMBs Calculated from All Protein-Coding Genes in Black and White Patients from Four Variant Filtering Criteria Using ESP6500 Database.** (a) variant MAF of all ESP6500 variants were used; (b) MAFs of AA (African American, n=2,217) population from ESP6500 were used to filter variants in Black individuals, and MAFs of EA (European American, n=4,298) population in ESP6500 were used to filter variants in White patients. The violin and box plots in red are TMB values from Black patients, and blue are from White Patients.

| Hugo Symbol | Entrez Gene ID | Isoform         | RefSeq         |
|-------------|----------------|-----------------|----------------|
| ABI1        | 10006          |                 |                |
| ABL1        | 25             | ENST00000318560 | NM_005157.4    |
| ABL2        | 27             | ENST00000502732 | NM_007314.3    |
| ACKR3       | 57007          |                 |                |
| ACSL3       | 2181           |                 |                |
| ACSL6       | 23305          |                 |                |
| ACTB        | 60             |                 |                |
| ACTG1       | 71             | ENST00000331925 | NM_001199954.1 |
| ACVR1       | 90             | ENST00000263640 | NM_001111067.2 |
| ACVR1B      | 91             |                 |                |
| ACVR2A      | 92             |                 |                |
| ADGRA2      | 25960          |                 |                |
| AFDN        | 4301           |                 |                |
| AFF1        | 4299           |                 |                |
| AFF3        | 3899           |                 |                |
| AFF4        | 27125          |                 |                |
| AGO1        | 26523          | ENST00000373204 | NM_012199.2    |
| AGO2        | 27161          | ENST00000220592 | NM_012154.3    |
| AJUBA       | 84962          | ENST00000262713 | NM_032876.5    |
| AKT1        | 207            | ENST00000349310 | NM_001014431.1 |
| AKT2        | 208            | ENST00000392038 | NM_001626.4    |
| AKT3        | 10000          | ENST00000263826 | NM_005465.4    |
| ALB         | 213            | ENST00000295897 | NM_000477.5    |
| ALK         | 238            | ENST00000389048 | NM_004304.4    |
| ALOX12B     | 242            | ENST00000319144 | NM_001139.2    |
| AMER1       | 139285         | ENST00000330258 | NM_152424.3    |
| ANKRD11     | 29123          | ENST00000301030 | NM_013275.5    |
| APC         | 324            | ENST00000257430 | NM_000038.5    |
| APH1A       | 51107          |                 |                |
| APLNR       | 187            | ENST00000257254 | NM_005161.4    |
| APOBEC3B    | 9582           |                 |                |
| AR          | 367            | ENST00000374690 | NM_000044.3    |
| ARAF        | 369            | ENST00000377045 | NM_001654.4    |
| ARFRP1      | 10139          |                 |                |
| ARHGAP26    | 23092          |                 |                |
| ARHGAP35    | 2909           | ENST00000404338 | NM_004491.4    |
| ARHGEF12    | 23365          |                 |                |
| ARHGEF28    | 64283          | ENST00000426542 | NM_001177693.1 |
| ARID1A      | 8289           | ENST00000324856 | NM_006015.4    |
| ARID1B      | 57492          | ENST00000346085 | NM_020732.3    |
| ARID2       | 196528         | ENST00000334344 | NM_152641.2    |
| ARID3A      | 1820           | ENST00000263620 | NM_005224.2    |
| ARID3B      | 10620          | ENST00000622429 | NM_001307939.1 |
| ARID3C      | 138715         | ENST00000378909 | NM_001017363.1 |
| ARID4A      | 5926           | ENST00000355431 | NM_002892.3    |
| ARID4B      | 51742          | ENST00000264183 | NM_001206794.1 |
| ARID5A      | 10865          | ENST00000357485 | NM_212481.1    |
| ARID5B      | 84159          | ENST00000279873 | NM_032199.2    |
| ARNT        | 405            |                 |                |
| ASMTL       | 8623           |                 |                |
| ASPSCR1     | 79058          |                 |                |
| ASXL1       | 171023         | ENST00000375687 | NM_015338.5    |
| ASXL2       | 55252          | ENST00000435504 | NM_018263.4    |

|          |        |                 |                |
|----------|--------|-----------------|----------------|
| ATF1     | 466    | ENST00000262053 | NM_005171.4    |
| ATG5     | 9474   |                 |                |
| ATIC     | 471    |                 |                |
| ATM      | 472    | ENST00000278616 | NM_000051.3    |
| ATP1A1   | 476    |                 |                |
| ATP2B3   | 492    |                 |                |
| ATP6AP1  | 537    | ENST00000369762 | NM_001183.5    |
| ATP6V1B2 | 526    | ENST00000276390 | NM_001693.3    |
| ATR      | 545    | ENST00000350721 | NM_001184.3    |
| ATRX     | 546    | ENST00000373344 | NM_000489.3    |
| ATXN2    | 6311   | ENST00000377617 | NM_002973.3    |
| ATXN7    | 6314   | ENST00000295900 | NM_000333.3    |
| AURKA    | 6790   | ENST00000312783 | NM_003600.2    |
| AURKB    | 9212   | ENST00000585124 | NM_004217.3    |
| AXIN1    | 8312   | ENST00000262320 | NM_003502.3    |
| AXIN2    | 8313   | ENST00000307078 | NM_004655.3    |
| AXL      | 558    | ENST00000301178 | NM_021913.4    |
| B2M      | 567    | ENST00000558401 | NM_004048.2    |
| BABAM1   | 29086  | ENST00000359435 | NM_001033549.1 |
| BACH2    | 60468  | ENST00000257749 | NM_001170794.1 |
| BAP1     | 8314   | ENST00000460680 | NM_004656.3    |
| BARD1    | 580    | ENST00000260947 | NM_000465.2    |
| BAX      | 581    |                 |                |
| BBC3     | 27113  | ENST00000449228 | NM_001127240.2 |
| BCL10    | 8915   | ENST00000370580 | NM_003921.4    |
| BCL11A   | 53335  |                 |                |
| BCL11B   | 64919  | ENST00000357195 | NM_138576.3    |
| BCL2     | 596    | ENST00000333681 | NM_000633.2    |
| BCL2L1   | 598    | ENST00000307677 | NM_138578.1    |
| BCL2L11  | 10018  | ENST00000393256 | NM_138621.4    |
| BCL2L2   | 599    |                 |                |
| BCL3     | 602    |                 |                |
| BCL6     | 604    | ENST00000232014 | NM_001706.4    |
| BCL7A    | 605    |                 |                |
| BCL9     | 607    | ENST00000234739 | NM_004326.3    |
| BCL9L    | 283149 |                 |                |
| BCOR     | 54880  | ENST00000378444 | NM_001123385.1 |
| BCORL1   | 63035  | ENST00000218147 |                |
| BCR      | 613    | ENST00000305877 | NM_004327.3    |
| BIRC3    | 330    | ENST00000263464 | NM_182962.2    |
| BLM      | 641    | ENST00000355112 | NM_000057.2    |
| BMPR1A   | 657    | ENST00000372037 | NM_004329.2    |
| BRAF     | 673    | ENST00000288602 | NM_004333.4    |
| BRCA1    | 672    | ENST00000357654 | NM_007294.3    |
| BRCA2    | 675    | ENST00000380152 | NM_000059.3    |
| BRD3     | 8019   |                 |                |
| BRD4     | 23476  | ENST00000263377 | NM_058243.2    |
| BRIP1    | 83990  | ENST00000259008 | NM_032043.2    |
| BRSK1    | 84446  |                 |                |
| BTG1     | 694    | ENST00000256015 | NM_001731.2    |
| BTG2     | 7832   |                 |                |
| BTK      | 695    | ENST00000308731 | NM_000061.2    |
| BTLA     | 151888 |                 |                |
| BUB1B    | 701    |                 |                |

|          |        |                 |                |
|----------|--------|-----------------|----------------|
| C2orf44  | 80304  |                 |                |
| CACNA1D  | 776    |                 |                |
| CAD      | 790    |                 |                |
| CALR     | 811    | ENST00000316448 | NM_004343.3    |
| CAMTA1   | 23261  |                 |                |
| CANT1    | 124583 |                 |                |
| CARD11   | 84433  | ENST00000396946 | NM_032415.4    |
| CARM1    | 10498  | ENST00000327064 | NM_199141.1    |
| CARS     | 833    |                 |                |
| CASC5    | 57082  |                 |                |
| CASP8    | 841    | ENST00000358485 | NM_001080125.1 |
| CBFA2T3  | 863    |                 |                |
| CBFB     | 865    | ENST00000412916 | NM_022845.2    |
| CBL      | 867    | ENST00000264033 | NM_005188.3    |
| CBLB     | 868    |                 |                |
| CBLC     | 23624  |                 |                |
| CCDC6    | 8030   |                 |                |
| CCN6     | 8838   |                 |                |
| CCNB1IP1 | 57820  |                 |                |
| CCNB3    | 85417  | ENST00000276014 | NM_033031.2    |
| CCND1    | 595    | ENST00000227507 | NM_053056.2    |
| CCND2    | 894    | ENST00000261254 | NM_001759.3    |
| CCND3    | 896    | ENST00000372991 | NM_001760.3    |
| CCNE1    | 898    | ENST00000262643 | NM_001238.2    |
| CCT6B    | 10693  |                 |                |
| CD22     | 933    |                 |                |
| CD274    | 29126  | ENST00000381577 | NM_014143.3    |
| CD276    | 80381  | ENST00000318443 | NM_001024736.1 |
| CD28     | 940    | ENST00000324106 | NM_006139.3    |
| CD36     | 948    |                 |                |
| CD58     | 965    | ENST00000369489 | NM_001779.2    |
| CD70     | 970    |                 |                |
| CD74     | 972    |                 |                |
| CD79A    | 973    | ENST00000221972 | NM_001783.3    |
| CD79B    | 974    | ENST00000392795 | NM_001039933.1 |
| CDC42    | 998    | ENST00000344548 | NM_001791.3    |
| CDC73    | 79577  | ENST00000367435 | NM_024529.4    |
| CDH1     | 999    | ENST00000261769 | NM_004360.3    |
| CDH11    | 1009   |                 |                |
| CDK12    | 51755  | ENST00000447079 | NM_016507.2    |
| CDK4     | 1019   | ENST00000257904 | NM_000075.3    |
| CDK6     | 1021   | ENST00000265734 | NM_001145306.1 |
| CDK8     | 1024   | ENST00000381527 | NM_001260.1    |
| CDKN1A   | 1026   | ENST00000244741 | NM_078467.2    |
| CDKN1B   | 1027   | ENST00000228872 | NM_004064.3    |
| CDKN2A   | 1029   | ENST00000304494 | NM_000077.4    |
| CDKN2B   | 1030   | ENST00000276925 | NM_004936.3    |
| CDKN2C   | 1031   | ENST00000262662 | NM_078626.2    |
| CDX2     | 1045   |                 |                |
| CEBPA    | 1050   | ENST00000498907 | NM_004364.3    |
| CENPA    | 1058   | ENST00000335756 | NM_001809.3    |
| CHCHD7   | 79145  |                 |                |
| CHD2     | 1106   |                 |                |
| CHD4     | 1108   |                 |                |

|         |        |                 |                |
|---------|--------|-----------------|----------------|
| CHEK1   | 1111   | ENST00000428830 | NM_001274.5    |
| CHEK2   | 11200  | ENST00000328354 | NM_007194.3    |
| CHIC2   | 26511  |                 |                |
| CHN1    | 1123   |                 |                |
| CIC     | 23152  | ENST00000575354 | NM_015125.3    |
| CIITA   | 4261   | ENST00000324288 |                |
| CKS1B   | 1163   |                 |                |
| CLIP1   | 6249   |                 |                |
| CLP1    | 10978  |                 |                |
| CLTC    | 1213   |                 |                |
| CLTCL1  | 8218   |                 |                |
| CMTR2   | 55783  | ENST00000338099 | NM_001099642.1 |
| CNBP    | 7555   |                 |                |
| CNOT3   | 4849   |                 |                |
| CNTRL   | 11064  |                 |                |
| COL1A1  | 1277   |                 |                |
| COL2A1  | 1280   |                 |                |
| CPS1    | 1373   |                 |                |
| CRBN    | 51185  | ENST00000231948 | NM_016302.3    |
| CREB1   | 1385   | ENST00000432329 | NM_134442.3    |
| CREB3L1 | 90993  |                 |                |
| CREB3L2 | 64764  |                 |                |
| CREBBP  | 1387   | ENST00000262367 | NM_004380.2    |
| CRKL    | 1399   | ENST00000354336 | NM_005207.3    |
| CRLF2   | 64109  | ENST00000381566 | NM_022148.2    |
| CRTC1   | 23373  |                 |                |
| CRTC3   | 64784  |                 |                |
| CSDE1   | 7812   | ENST00000438362 | NM_001242891.1 |
| CSF1    | 1435   |                 |                |
| CSF1R   | 1436   | ENST00000286301 | NM_005211.3    |
| CSF3R   | 1441   | ENST00000361632 | NM_000760.3    |
| CTCF    | 10664  | ENST00000264010 | NM_006565.3    |
| CTLA4   | 1493   | ENST00000302823 | NM_005214.4    |
| CTNNA1  | 1495   |                 |                |
| CTNNB1  | 1499   | ENST00000349496 | NM_001904.3    |
| CTR9    | 9646   | ENST00000361367 | NM_014633.4    |
| CUL3    | 8452   | ENST00000264414 | NM_003590.4    |
| CUL4A   | 8451   |                 |                |
| CUX1    | 1523   | ENST00000292535 | NM_181552.3    |
| CXCR4   | 7852   | ENST00000241393 | NM_003467.2    |
| CXORF67 | 340602 |                 |                |
| CYLD    | 1540   | ENST00000398568 | NM_001042355.1 |
| CYP17A1 | 1586   |                 |                |
| CYP19A1 | 1588   | ENST00000260433 | NM_000103.3    |
| CYSLTR2 | 57105  | ENST00000282018 | NM_020377.2    |
| DAXX    | 1616   | ENST00000374542 | NM_001141970.1 |
| DCTN1   | 1639   |                 |                |
| DCUN1D1 | 54165  | ENST00000292782 | NM_020640.2    |
| DDB2    | 1643   |                 |                |
| DDIT3   | 1649   | ENST00000346473 | NM_001195057.1 |
| DDR1    | 780    |                 |                |
| DDR2    | 4921   | ENST00000367921 | NM_006182.2    |
| DDX10   | 1662   |                 |                |
| DDX3X   | 1654   | ENST00000399959 | NM_001356.4    |

|         |        |                 |                |
|---------|--------|-----------------|----------------|
| DDX4    | 54514  | ENST00000505374 | NM_024415.2    |
| DDX41   | 51428  | ENST00000507955 | NM_016222.2    |
| DDX5    | 1655   |                 |                |
| DDX6    | 1656   |                 |                |
| DEK     | 7913   | ENST00000397239 | NM_003472.3    |
| DICER1  | 23405  | ENST00000343455 | NM_030621.3    |
| DIS3    | 22894  | ENST00000377767 | NM_014953.3    |
| DKK1    | 22943  | ENST00000373970 | NM_012242.2    |
| DKK2    | 27123  | ENST00000285311 | NM_014421.2    |
| DKK3    | 27122  | ENST00000326932 | NM_001018057.1 |
| DKK4    | 27121  | ENST00000220812 | NM_014420.2    |
| DNAJB1  | 3337   | ENST00000254322 | NM_006145.1    |
| DNM2    | 1785   |                 |                |
| DNMT1   | 1786   | ENST00000340748 | NM_001379.2    |
| DNMT3A  | 1788   | ENST00000264709 | NM_022552.4    |
| DNMT3B  | 1789   | ENST00000328111 | NM_006892.3    |
| DOT1L   | 84444  | ENST00000398665 | NM_032482.2    |
| DROSHA  | 29102  | ENST00000344624 | NM_013235.4    |
| DTX1    | 1840   | ENST00000257600 | NM_004416.2    |
| DUSP2   | 1844   |                 |                |
| DUSP22  | 56940  | ENST00000344450 | NM_020185.4    |
| DUSP4   | 1846   | ENST00000240100 | NM_001394.6    |
| DUSP9   | 1852   |                 |                |
| E2F3    | 1871   | ENST00000346618 | NM_001949.4    |
| EBF1    | 1879   |                 |                |
| ECT2L   | 345930 | ENST00000367682 | NM_001077706.2 |
| EED     | 8726   | ENST00000263360 | NM_003797.3    |
| EGFL7   | 51162  | ENST00000308874 | NM_201446.2    |
| EGFR    | 1956   | ENST00000275493 | NM_005228.3    |
| EGR1    | 1958   | ENST00000239938 | NM_001964.2    |
| EIF1AX  | 1964   | ENST00000379607 | NM_001412.3    |
| EIF3E   | 3646   |                 |                |
| EIF4A2  | 1974   | ENST00000323963 | NM_001967.3    |
| EIF4E   | 1977   | ENST00000280892 | NM_001130678.1 |
| ELF3    | 1999   | ENST00000359651 | NM_004433.4    |
| ELF4    | 2000   |                 |                |
| ELK4    | 2005   |                 |                |
| ELL     | 8178   |                 |                |
| ELMSAN1 | 91748  | ENST00000286523 | NM_001043318.2 |
| ELN     | 2006   |                 |                |
| ELP2    | 55250  |                 |                |
| EML4    | 27436  |                 |                |
| EMSY    | 56946  |                 |                |
| EP300   | 2033   | ENST00000263253 | NM_001429.3    |
| EP400   | 57634  | ENST00000389561 | NM_015409.3    |
| EPAS1   | 2034   | ENST00000263734 | NM_001430.4    |
| EPCAM   | 4072   | ENST00000263735 | NM_002354.2    |
| EPHA3   | 2042   | ENST00000336596 | NM_005233.5    |
| EPHA5   | 2044   | ENST00000273854 | NM_004439.5    |
| EPHA7   | 2045   | ENST00000369303 | NM_004440.3    |
| EPHB1   | 2047   | ENST00000398015 | NM_004441.4    |
| EPHB4   | 2050   |                 |                |
| EPOR    | 2057   | ENST00000222139 | NM_000121.3    |
| EPS15   | 2060   |                 |                |



|         |        |                 |                |
|---------|--------|-----------------|----------------|
| ERBB2   | 2064   | ENST00000269571 | NM_004448.2    |
| ERBB3   | 2065   | ENST00000267101 | NM_001982.3    |
| ERBB4   | 2066   | ENST00000342788 | NM_005235.2    |
| ERC1    | 23085  |                 |                |
| ERCC2   | 2068   | ENST00000391945 | NM_000400.3    |
| ERCC3   | 2071   | ENST00000285398 | NM_000122.1    |
| ERCC4   | 2072   | ENST00000311895 | NM_005236.2    |
| ERCC5   | 2073   | ENST00000355739 | NM_000123.3    |
| ERF     | 2077   | ENST00000222329 | NM_006494.2    |
| ERG     | 2078   | ENST00000288319 | NM_182918.3    |
| ERRFI1  | 54206  | ENST00000377482 | NM_018948.3    |
| ESCO2   | 157570 | ENST00000305188 | NM_001017420.2 |
| ESR1    | 2099   | ENST00000206249 | NM_001122740.1 |
| ETAA1   | 54465  | ENST00000272342 | NM_019002.3    |
| ETNK1   | 55500  | ENST00000266517 | NM_018638.4    |
| ETS1    | 2113   |                 |                |
| ETV1    | 2115   | ENST00000405192 | NM_001163147.1 |
| ETV4    | 2118   | ENST00000319349 | NM_001079675.2 |
| ETV5    | 2119   | ENST00000306376 | NM_004454.2    |
| ETV6    | 2120   | ENST00000396373 | NM_001987.4    |
| EWSR1   | 2130   | ENST00000397938 | NM_005243.3    |
| EXOSC6  | 118460 |                 |                |
| EXT1    | 2131   |                 |                |
| EXT2    | 2132   |                 |                |
| EZH1    | 2145   | ENST00000428826 | NM_001991.3    |
| EZH2    | 2146   | ENST00000320356 | NM_004456.4    |
| EZR     | 7430   |                 |                |
| FAF1    | 11124  |                 |                |
| FAM175A | 84142  | ENST00000321945 | NM_139076.2    |
| FAM46C  | 54855  | ENST00000369448 | NM_017709.3    |
| FAM58A  | 92002  | ENST00000406277 | NM_152274.4    |
| FANCA   | 2175   | ENST00000389301 | NM_000135.2    |
| FANCC   | 2176   | ENST00000289081 | NM_000136.2    |
| FANCD2  | 2177   | ENST00000383807 | NM_001018115.1 |
| FANCE   | 2178   |                 |                |
| FANCF   | 2188   |                 |                |
| FANCG   | 2189   |                 |                |
| FANCL   | 55120  |                 |                |
| FAS     | 355    | ENST00000355740 | NM_000043.4    |
| FAT1    | 2195   | ENST00000441802 | NM_005245.3    |
| FAT4    | 79633  |                 |                |
| FBXO11  | 80204  | ENST00000403359 | NM_001190274.1 |
| FBXO31  | 79791  |                 |                |
| FBXW7   | 55294  | ENST00000281708 | NM_033632.3    |
| FCGR2B  | 2213   |                 |                |
| FCRL4   | 83417  |                 |                |
| FES     | 2242   |                 |                |
| FEV     | 54738  | ENST00000295727 | NM_017521.2    |
| FGF10   | 2255   |                 |                |
| FGF12   | 2257   |                 |                |
| FGF14   | 2259   |                 |                |
| FGF19   | 9965   | ENST00000294312 | NM_005117.2    |
| FGF23   | 8074   |                 |                |
| FGF3    | 2248   | ENST00000334134 | NM_005247.2    |

|         |        |                 |                |
|---------|--------|-----------------|----------------|
| FGF4    | 2249   | ENST00000168712 | NM_002007.2    |
| FGF6    | 2251   |                 |                |
| FGFR1   | 2260   | ENST00000425967 | NM_001174067.1 |
| FGFR1OP | 11116  |                 |                |
| FGFR2   | 2263   | ENST00000358487 | NM_000141.4    |
| FGFR3   | 2261   | ENST00000260795 | NM_000142.4    |
| FGFR4   | 2264   | ENST00000292408 | NM_213647.1    |
| FH      | 2271   | ENST00000366560 | NM_000143.3    |
| FHIT    | 2272   |                 |                |
| FIP1L1  | 81608  |                 |                |
| FLCN    | 201163 | ENST00000285071 | NM_144997.5    |
| FLI1    | 2313   | ENST00000527786 | NM_002017.4    |
| FLT1    | 2321   | ENST00000282397 | NM_002019.4    |
| FLT3    | 2322   | ENST00000241453 | NM_004119.2    |
| FLT4    | 2324   | ENST00000261937 | NM_182925.4    |
| FLYWCH1 | 84256  |                 |                |
| FNBP1   | 23048  |                 |                |
| FOXA1   | 3169   | ENST00000250448 | NM_004496.3    |
| FOXF1   | 2294   | ENST00000262426 | NM_001451.2    |
| FOXL2   | 668    | ENST00000330315 | NM_023067.3    |
| FOXO1   | 2308   | ENST00000379561 | NM_002015.3    |
| FOXO3   | 2309   |                 |                |
| FOXO4   | 4303   |                 |                |
| FOXP1   | 27086  | ENST00000318789 | NM_001244814.1 |
| FRS2    | 10818  |                 |                |
| FSTL3   | 10272  |                 |                |
| FUBP1   | 8880   | ENST00000370768 | NM_003902.3    |
| FURIN   | 5045   | ENST00000268171 | NM_001289823.1 |
| FUS     | 2521   |                 |                |
| FYN     | 2534   | ENST00000368678 | NM_153047.3    |
| GAB1    | 2549   | ENST00000262994 | NM_002039.3    |
| GAB2    | 9846   | ENST00000361507 | NM_080491.2    |
| GABRA6  | 2559   |                 |                |
| GADD45B | 4616   |                 |                |
| GAS7    | 8522   |                 |                |
| GATA1   | 2623   | ENST00000376670 | NM_002049.3    |
| GATA2   | 2624   | ENST00000341105 | NM_032638.4    |
| GATA3   | 2625   | ENST00000346208 | NM_002051.2    |
| GATA4   | 2626   |                 |                |
| GATA6   | 2627   |                 |                |
| GID4    | 79018  |                 |                |
| GLI1    | 2735   | ENST00000228682 | NM_005269.2    |
| GMPS    | 8833   |                 |                |
| GNA11   | 2767   | ENST00000078429 | NM_002067.2    |
| GNA12   | 2768   | ENST00000275364 | NM_007353.2    |
| GNA13   | 10672  | ENST00000439174 | NM_006572.5    |
| GNAQ    | 2776   | ENST00000286548 | NM_002072.3    |
| GNAS    | 2778   | ENST00000371085 | NM_000516.4    |
| GNB1    | 2782   | ENST00000378609 | NM_001282539.1 |
| GOLGA5  | 9950   |                 |                |
| GOPC    | 57120  |                 |                |
| GPC3    | 2719   |                 |                |
| GPHN    | 10243  |                 |                |
| GPS2    | 2874   | ENST00000380728 | NM_004489.4    |

|           |        |                 |                |
|-----------|--------|-----------------|----------------|
| GREM1     | 26585  | ENST00000300177 | NM_013372.6    |
| GRIN2A    | 2903   | ENST00000330684 | NM_001134407.1 |
| GRM3      | 2913   |                 |                |
| GSK3B     | 2932   | ENST00000316626 | NM_002093.3    |
| GTF2I     | 2969   | ENST00000324896 | NM_032999.3    |
| GTSE1     | 51512  |                 |                |
| H3F3A     | 3020   | ENST00000366813 | NM_002107.4    |
| H3F3AP4   | 440926 | ENST00000316450 | null           |
| H3F3B     | 3021   | ENST00000254810 | NM_005324.3    |
| H3F3C     | 440093 | ENST00000340398 | NM_001013699.2 |
| HDAC1     | 3065   | ENST00000373548 | NM_004964.2    |
| HDAC4     | 9759   | ENST00000345617 | NM_006037.3    |
| HDAC7     | 51564  | ENST00000427332 | XM_011538481.1 |
| HERPUD1   | 9709   |                 |                |
| HEY1      | 23462  |                 |                |
| HGF       | 3082   | ENST00000222390 | NM_000601.4    |
| HIF1A     | 3091   | ENST00000337138 | NM_001530.3    |
| HIP1      | 3092   |                 |                |
| HIRA      | 7290   |                 |                |
| HIST1H1B  | 3009   | ENST00000331442 | NM_005322.2    |
| HIST1H1C  | 3006   | ENST00000343677 | NM_005319.3    |
| HIST1H1D  | 3007   | ENST00000244534 | NM_005320.2    |
| HIST1H1E  | 3008   | ENST00000304218 | NM_005321.2    |
| HIST1H2AC | 8334   | ENST00000314088 | NM_003512.3    |
| HIST1H2AG | 8969   | ENST00000358739 | NM_003509.2    |
| HIST1H2AL | 8332   | ENST00000357320 | NM_003511      |
| HIST1H2AM | 8336   | ENST00000359611 | NM_003514      |
| HIST1H2BC | 8347   | ENST00000314332 | NM_003518.3    |
| HIST1H2BD | 3017   | ENST00000289316 | NM_021063.3    |
| HIST1H2BG | 8339   | ENST00000244601 | NM_003518      |
| HIST1H2BJ | 8970   | ENST00000339812 | NM_021058.3    |
| HIST1H2BK | 85236  | ENST00000356950 | NM_080593.2    |
| HIST1H2BO | 8348   | ENST00000616182 | NM_003527.4    |
| HIST1H3A  | 8350   | ENST00000357647 | NM_003529.2    |
| HIST1H3B  | 8358   | ENST00000244661 | NM_003537.3    |
| HIST1H3C  | 8352   | ENST00000540144 | NM_003531.2    |
| HIST1H3D  | 8351   | ENST00000356476 | NM_003530.4    |
| HIST1H3E  | 8353   | ENST00000360408 | NM_003532.2    |
| HIST1H3F  | 8968   | ENST00000446824 | NM_021018.2    |
| HIST1H3G  | 8355   | ENST00000305910 | NM_003534.2    |
| HIST1H3H  | 8357   | ENST00000369163 | NM_003536.2    |
| HIST1H3I  | 8354   | ENST00000328488 | NM_003533.2    |
| HIST1H3J  | 8356   | ENST00000359303 | NM_003535.2    |
| HIST1H4I  | 8294   |                 |                |
| HIST2H3A  | 333932 | ENST00000331491 | NM_001005464.2 |
| HIST2H3C  | 126961 | ENST00000369158 | NM_021059.2    |
| HIST2H3D  | 653604 | ENST00000331491 | NM_001123375.2 |
| HIST3H3   | 8290   | ENST00000366696 | NM_003493.2    |
| HLA-A     | 3105   | ENST00000376809 | NM_001242758.1 |
| HLA-B     | 3106   | ENST00000412585 | NM_005514.6    |
| HLA-C     | 3107   | ENST00000376228 | NM_002117.5    |
| HLF       | 3131   |                 |                |
| HMGA1     | 3159   |                 |                |
| HMGA2     | 8091   |                 |                |

|           |       |                 |                 |
|-----------|-------|-----------------|-----------------|
| HNF1A     | 6927  | ENST00000257555 | NM_000545.5     |
| HNRNPA2B1 | 3181  |                 |                 |
| HOOK3     | 84376 |                 |                 |
| HOXA11    | 3207  |                 |                 |
| HOXA13    | 3209  |                 |                 |
| HOXA3     | 3200  |                 |                 |
| HOXA9     | 3205  |                 |                 |
| HOXB13    | 10481 | ENST00000290295 | NM_006361.5     |
| HOXC11    | 3227  |                 |                 |
| HOXC13    | 3229  |                 |                 |
| HOXD11    | 3237  |                 |                 |
| HOXD13    | 3239  |                 |                 |
| HRAS      | 3265  | ENST00000311189 | NM_001130442.1  |
| HSD3B1    | 3283  |                 |                 |
| HSP90AA1  | 3320  |                 |                 |
| HSP90AB1  | 3326  |                 |                 |
| ICK       | 22858 |                 |                 |
| ICOSLG    | 23308 | ENST00000407780 | NM_015259.4     |
| ID3       | 3399  | ENST00000374561 | NM_002167.4     |
| IDH1      | 3417  | ENST00000345146 | NM_005896.2     |
| IDH2      | 3418  | ENST00000330062 | NM_002168.2     |
| IFNGR1    | 3459  | ENST00000367739 | NM_000416.2     |
| IGF1      | 3479  | ENST00000307046 | NM_001111285.1  |
| IGF1R     | 3480  | ENST00000268035 | NM_000875.3     |
| IGF2      | 3481  | ENST00000434045 | NM_001127598.1  |
| IGH       | 3492  |                 |                 |
| IGK       | 50802 |                 |                 |
| IGL       | 3535  |                 |                 |
| IKBKB     | 3551  |                 |                 |
| IKBKE     | 9641  | ENST00000367120 | NM_014002.3     |
| IKZF1     | 10320 | ENST00000331340 | ENST00000331340 |
| IKZF2     | 22807 |                 |                 |
| IKZF3     | 22806 | ENST00000346872 | NM_012481.4     |
| IL10      | 3586  | ENST00000423557 | NM_000572.2     |
| IL2       | 3558  |                 |                 |
| IL21R     | 50615 |                 |                 |
| IL3       | 3562  | ENST00000296870 | NM_000588.3     |
| IL6ST     | 3572  |                 |                 |
| IL7R      | 3575  | ENST00000303115 | NM_002185.3     |
| INHA      | 3623  | ENST00000243786 | NM_002191.3     |
| INHBA     | 3624  | ENST00000242208 | NM_002192.2     |
| INPP4A    | 3631  | ENST00000074304 | NM_001134224.1  |
| INPP4B    | 8821  | ENST00000262992 | NM_001101669.1  |
| INPP5D    | 3635  |                 |                 |
| INPPL1    | 3636  | ENST00000298229 | NM_001567.3     |
| INSR      | 3643  | ENST00000302850 | NM_000208.2     |
| IRF1      | 3659  | ENST00000245414 | NM_002198.2     |
| IRF2      | 3660  |                 |                 |
| IRF4      | 3662  | ENST00000380956 | NM_002460.3     |
| IRF8      | 3394  | ENST00000268638 | NM_002163.2     |
| IRS1      | 3667  | ENST00000305123 | NM_005544.2     |
| IRS2      | 8660  | ENST00000375856 | NM_003749.2     |
| IRS4      | 8471  |                 |                 |
| ITK       | 3702  |                 |                 |

|        |        |                 |                |
|--------|--------|-----------------|----------------|
| JAK1   | 3716   | ENST00000342505 | NM_002227.2    |
| JAK2   | 3717   | ENST00000381652 | NM_004972.3    |
| JAK3   | 3718   | ENST00000458235 | NM_000215.3    |
| JARID2 | 3720   | ENST00000341776 | NM_004973.3    |
| JAZF1  | 221895 |                 |                |
| JUN    | 3725   | ENST00000371222 | NM_002228.3    |
| KAT6A  | 7994   | ENST00000265713 | NM_006766.4    |
| KAT6B  | 23522  |                 |                |
| KBTBD4 | 55709  | ENST00000395288 | NM_016506.5    |
| KCNJ5  | 3762   |                 |                |
| KDM2B  | 84678  |                 |                |
| KDM4C  | 23081  |                 |                |
| KDM5A  | 5927   | ENST00000399788 | NM_001042603.1 |
| KDM5C  | 8242   | ENST00000375401 | NM_004187.3    |
| KDM6A  | 7403   | ENST00000377967 | NM_021140.2    |
| KDR    | 3791   | ENST00000263923 | NM_002253.2    |
| KDSR   | 2531   |                 |                |
| KEAP1  | 9817   | ENST00000171111 | NM_203500.1    |
| KEL    | 3792   |                 |                |
| KIF5B  | 3799   |                 |                |
| KIT    | 3815   | ENST00000288135 | NM_000222.2    |
| KLF2   | 10365  | ENST00000248071 | NM_016270.2    |
| KLF4   | 9314   | ENST00000374672 | NM_004235.4    |
| KLF5   | 688    | ENST00000377687 | NM_001730.4    |
| KLF6   | 1316   |                 |                |
| KLHL6  | 89857  |                 |                |
| KLK2   | 3817   |                 |                |
| KMT2A  | 4297   | ENST00000534358 | NM_001197104.1 |
| KMT2B  | 9757   | ENST00000222270 | NM_014727.1    |
| KMT2C  | 58508  | ENST00000262189 | NM_170606.2    |
| KMT2D  | 8085   | ENST00000301067 | NM_003482.3    |
| KMT5A  | 387893 | ENST00000330479 | NM_020382.3    |
| KNSTRN | 90417  | ENST00000249776 | NM_033286.3    |
| KRAS   | 3845   | ENST00000256078 | NM_033360.2    |
| KSR2   | 283455 | ENST00000339824 |                |
| KTN1   | 3895   |                 |                |
| LASP1  | 3927   |                 |                |
| LATS1  | 9113   | ENST00000253339 | NM_004690.3    |
| LATS2  | 26524  | ENST00000382592 | NM_014572.2    |
| LCK    | 3932   | ENST00000336890 | NM_001042771.2 |
| LCP1   | 3936   |                 |                |
| LEF1   | 51176  |                 |                |
| LIFR   | 3977   |                 |                |
| LMNA   | 4000   |                 |                |
| LMO1   | 4004   | ENST00000335790 | NM_002315.2    |
| LMO2   | 4005   | ENST00000395833 | NM_001142315.1 |
| LPP    | 4026   |                 |                |
| LRIG3  | 121227 |                 |                |
| LRP1B  | 53353  |                 |                |
| LRP5   | 4041   | ENST00000294304 | NM_001291902.1 |
| LRP6   | 4040   | ENST00000261349 | NM_002336.2    |
| LRRK2  | 120892 |                 |                |
| LTB    | 4050   | ENST00000376117 | NM_002341.1    |
| LTK    | 4058   |                 |                |

|         |           |                 |                |
|---------|-----------|-----------------|----------------|
| LYL1    | 4066      |                 |                |
| LYN     | 4067      | ENST00000519728 | NM_002350.3    |
| LZTR1   | 8216      | ENST00000215739 | NM_006767.3    |
| MAD2L2  | 10459     | ENST00000235310 | NM_001127325.1 |
| MAF     | 4094      | ENST00000393350 | NM_001031804.2 |
| MAFB    | 9935      | ENST00000373313 | NM_005461.4    |
| MAGED1  | 9500      |                 |                |
| MALT1   | 10892     | ENST00000348428 | NM_006785.3    |
| MAML2   | 84441     |                 |                |
| MAP2K1  | 5604      | ENST00000307102 | NM_002755.3    |
| MAP2K2  | 5605      | ENST00000262948 | NM_030662.3    |
| MAP2K4  | 6416      | ENST00000353533 | NM_003010.3    |
| MAP3K1  | 4214      | ENST00000399503 | NM_005921.1    |
| MAP3K13 | 9175      | ENST00000265026 | NM_004721.4    |
| MAP3K14 | 9020      | ENST00000344686 | NM_003954.3    |
| MAP3K6  | 9064      |                 |                |
| MAP3K7  | 6885      |                 |                |
| MAPK1   | 5594      | ENST00000215832 | NM_002745.4    |
| MAPK3   | 5595      | ENST00000263025 | NM_002746.2    |
| MAPKAP1 | 79109     | ENST00000265960 | NM_001006617.1 |
| MAX     | 4149      | ENST00000358664 | NM_002382.4    |
| MBD6    | 114785    | ENST00000355673 | NM_052897.3    |
| MCL1    | 4170      | ENST00000369026 | NM_021960.4    |
| MDC1    | 9656      | ENST00000376406 | NM_014641.2    |
| MDM2    | 4193      | ENST00000462284 | NM_002392.5    |
| MDM4    | 4194      | ENST00000367182 | NM_002393.4    |
| MDS2    | 259283    |                 |                |
| MECOM   | 2122      | ENST00000468789 | NM_001105078.3 |
| MED12   | 9968      | ENST00000374080 | NM_005120.2    |
| MEF2B   | 100271849 | ENST00000162023 | NM_001145785.1 |
| MEF2C   | 4208      |                 |                |
| MEN1    | 4221      | ENST00000337652 | NM_000244.3    |
| MERTK   | 10461     |                 |                |
| MET     | 4233      | ENST00000397752 | NM_000245.2    |
| MGA     | 23269     | ENST00000219905 | NM_001164273.1 |
| MGAM    | 8972      | ENST00000549489 | NM_004668.2    |
| MIB1    | 57534     |                 |                |
| MITF    | 4286      | ENST00000352241 | NM_198159.2    |
| MKI67   | 4288      |                 |                |
| MKNK1   | 8569      |                 |                |
| MLF1    | 4291      |                 |                |
| MLH1    | 4292      | ENST00000231790 | NM_000249.3    |
| MLLT1   | 4298      | ENST00000252674 | NM_005934.3    |
| MLLT10  | 8028      | ENST00000307729 | NM_001195626.1 |
| MLLT11  | 10962     |                 |                |
| MLLT3   | 4300      |                 |                |
| MLLT6   | 4302      |                 |                |
| MN1     | 4330      |                 |                |
| MNX1    | 3110      |                 |                |
| MOB3B   | 79817     | ENST00000262244 | NM_024761.4    |
| MPEG1   | 219972    | ENST00000361050 | NM_001039396.1 |
| MPL     | 4352      | ENST00000372470 | NM_005373.2    |
| MRE11A  | 4361      | ENST00000323929 | NM_005591.3    |
| MRTFA   | 57591     |                 |                |

|        |        |                 |                |
|--------|--------|-----------------|----------------|
| MSH2   | 4436   | ENST00000233146 | NM_000251.2    |
| MSH3   | 4437   | ENST00000265081 | NM_002439.4    |
| MSH6   | 2956   | ENST00000234420 | NM_000179.2    |
| MSI1   | 4440   | ENST00000257552 | NM_002442.3    |
| MSI2   | 124540 | ENST00000284073 | NM_138962.2    |
| MSN    | 4478   |                 |                |
| MST1   | 4485   | ENST00000449682 | NM_020998.3    |
| MST1R  | 4486   | ENST00000296474 | NM_002447.2    |
| MTAP   | 4507   | ENST00000380172 | NM_002451.3    |
| MTCP1  | 4515   |                 |                |
| MTOR   | 2475   | ENST00000361445 | NM_004958.3    |
| MUC1   | 4582   |                 |                |
| MUTYH  | 4595   | ENST00000372115 | NM_001048171.1 |
| MYB    | 4602   |                 |                |
| MYC    | 4609   | ENST00000377970 | NM_002467.4    |
| MYCL   | 4610   | ENST00000397332 | NM_001033082.2 |
| MYCN   | 4613   | ENST00000281043 | NM_005378.4    |
| MYD88  | 4615   | ENST00000396334 | NM_002468.4    |
| MYH11  | 4629   |                 |                |
| MYH9   | 4627   |                 |                |
| MYO18A | 399687 |                 |                |
| MYO5A  | 4644   |                 |                |
| MYOD1  | 4654   | ENST00000250003 | NM_002478.4    |
| NAB2   | 4665   |                 |                |
| NACA   | 4666   |                 |                |
| NADK   | 65220  | ENST00000341426 | NM_001198993.1 |
| NBEAP1 | 606    |                 |                |
| NBN    | 4683   | ENST00000265433 | NM_002485.4    |
| NCOA1  | 8648   |                 |                |
| NCOA2  | 10499  |                 |                |
| NCOA3  | 8202   | ENST00000371998 | NM_181659.2    |
| NCOA4  | 8031   |                 |                |
| NCOR1  | 9611   | ENST00000268712 | NM_006311.3    |
| NCOR2  | 9612   | ENST00000405201 | NM_006312.6    |
| NCSTN  | 23385  | ENST00000294785 | NM_015331.2    |
| NDRG1  | 10397  |                 |                |
| NEGR1  | 257194 | ENST00000357731 | NM_173808.2    |
| NF1    | 4763   | ENST00000358273 | NM_001042492.2 |
| NF2    | 4771   | ENST00000338641 | NM_000268.3    |
| NFATC2 | 4773   |                 |                |
| NFE2   | 4778   | ENST00000312156 | NM_001136023.2 |
| NFE2L2 | 4780   | ENST00000397062 | NM_006164.4    |
| NFIB   | 4781   |                 |                |
| NFKB2  | 4791   |                 |                |
| NFKBIA | 4792   | ENST00000216797 | NM_020529.2    |
| NFKBIE | 4794   |                 |                |
| NIN    | 51199  |                 |                |
| NKX2-1 | 7080   | ENST00000354822 | NM_001079668.2 |
| NKX3-1 | 4824   | ENST00000380871 | NM_006167.3    |
| NOD1   | 10392  |                 |                |
| NONO   | 4841   |                 |                |
| NOTCH1 | 4851   | ENST00000277541 | NM_017617.3    |
| NOTCH2 | 4853   | ENST00000256646 | NM_024408.3    |
| NOTCH3 | 4854   | ENST00000263388 | NM_000435.2    |

|          |        |                 |                |
|----------|--------|-----------------|----------------|
| NOTCH4   | 4855   | ENST00000375023 | NM_004557.3    |
| NPM1     | 4869   | ENST00000296930 | NM_002520.6    |
| NR4A3    | 8013   | ENST00000395097 | NM_006981.3    |
| NRAS     | 4893   | ENST00000369535 | NM_002524.4    |
| NRG1     | 3084   | ENST00000405005 | NM_013964.3    |
| NSD1     | 64324  | ENST00000439151 | NM_022455.4    |
| NT5C2    | 22978  | ENST00000343289 | NM_001134373.2 |
| NTHL1    | 4913   | ENST00000219066 | NM_002528.5    |
| NTRK1    | 4914   | ENST00000524377 | NM_002529.3    |
| NTRK2    | 4915   | ENST00000277120 | NM_006180.3    |
| NTRK3    | 4916   | ENST00000360948 | NM_001012338.2 |
| NUF2     | 83540  | ENST00000271452 | NM_031423.3    |
| NUMA1    | 4926   |                 |                |
| NUP214   | 8021   |                 |                |
| NUP93    | 9688   | ENST00000308159 | NM_014669.4    |
| NUP98    | 4928   | ENST00000359171 | XM_005252950.1 |
| NUTM1    | 256646 | ENST00000333756 | XM_011521429.1 |
| NUTM2A   | 728118 |                 |                |
| NUTM2B   | 729262 |                 |                |
| OLIG2    | 10215  |                 |                |
| OMD      | 4958   |                 |                |
| P2RY8    | 286530 | ENST00000381297 | NM_178129.4    |
| PAFAH1B2 | 5049   |                 |                |
| PAG1     | 55824  |                 |                |
| PAK1     | 5058   | ENST00000356341 | NM_002576.4    |
| PAK3     | 5063   |                 |                |
| PAK5     | 57144  | ENST00000353224 | NM_177990.2    |
| PALB2    | 79728  | ENST00000261584 | NM_024675.3    |
| PARK2    | 5071   | ENST00000366898 | NM_004562.2    |
| PARP1    | 142    | ENST00000366794 | NM_001618.3    |
| PARP2    | 10038  |                 |                |
| PARP3    | 10039  |                 |                |
| PASK     | 23178  |                 |                |
| PAX3     | 5077   |                 |                |
| PAX5     | 5079   | ENST00000358127 | NM_016734.2    |
| PAX7     | 5081   |                 |                |
| PAX8     | 7849   | ENST00000263334 | NM_003466.3    |
| PBRM1    | 55193  | ENST00000394830 | NM_018313.4    |
| PBX1     | 5087   |                 |                |
| PC       | 5091   |                 |                |
| PCBP1    | 5093   | ENST00000303577 | NM_006196.3    |
| PCLO     | 27445  |                 |                |
| PCM1     | 5108   |                 |                |
| PCSK7    | 9159   |                 |                |
| PDCD1    | 5133   | ENST00000334409 | NM_005018.2    |
| PDCD11   | 22984  |                 |                |
| PDCD1LG2 | 80380  | ENST00000397747 | NM_025239.3    |
| PDE4DIP  | 9659   |                 |                |
| PDGFB    | 5155   | ENST00000331163 | NM_002608.2    |
| PDGFRA   | 5156   | ENST00000257290 | NM_006206.4    |
| PDGFRB   | 5159   | ENST00000261799 | NM_002609.3    |
| PDK1     | 5163   |                 |                |
| PDPK1    | 5170   | ENST00000342085 | NM_002613.4    |
| PDS5B    | 23047  | ENST00000315596 | NM_015032.3    |



|         |        |                 |                |
|---------|--------|-----------------|----------------|
| PER1    | 5187   |                 |                |
| PGBD5   | 79605  | ENST00000525115 | NM_001258311.1 |
| PGR     | 5241   | ENST00000325455 | NM_000926.4    |
| PHF1    | 5252   |                 |                |
| PHF6    | 84295  | ENST00000332070 | NM_001015877.1 |
| PHOX2B  | 8929   | ENST00000226382 | NM_003924.3    |
| PICALM  | 8301   |                 |                |
| PIGA    | 5277   | ENST00000333590 | NM_002641.3    |
| PIK3C2B | 5287   |                 |                |
| PIK3C2G | 5288   | ENST00000266497 | NM_004570.4    |
| PIK3C3  | 5289   | ENST00000262039 | NM_002647.2    |
| PIK3CA  | 5290   | ENST00000263967 | NM_006218.2    |
| PIK3CB  | 5291   | ENST00000289153 | NM_006219.2    |
| PIK3CD  | 5293   | ENST00000377346 | NM_005026.3    |
| PIK3CG  | 5294   | ENST00000359195 | NM_002649.2    |
| PIK3R1  | 5295   | ENST00000274335 | NM_181523.2    |
| PIK3R2  | 5296   | ENST00000222254 | NM_005027.3    |
| PIK3R3  | 8503   | ENST00000262741 | NM_003629.3    |
| PIM1    | 5292   | ENST00000373509 | NM_002648.3    |
| PLAG1   | 5324   |                 |                |
| PLCG1   | 5335   | ENST00000373271 | NM_182811.1    |
| PLCG2   | 5336   | ENST00000359376 | NM_002661.3    |
| PLK2    | 10769  | ENST00000274289 | NM_006622.3    |
| PMAIP1  | 5366   | ENST00000316660 | NM_021127.2    |
| PML     | 5371   |                 |                |
| PMS1    | 5378   | ENST00000441310 | NM_000534.4    |
| PMS2    | 5395   | ENST00000265849 | NM_000535.5    |
| PNRC1   | 10957  | ENST00000336032 | NM_006813.2    |
| POLD1   | 5424   | ENST00000440232 | NM_002691.3    |
| POLE    | 5426   | ENST00000320574 | NM_006231.2    |
| POLQ    | 10721  |                 |                |
| POT1    | 25913  | ENST00000357628 | NM_015450.2    |
| POU2AF1 | 5450   |                 |                |
| POU5F1  | 5460   |                 |                |
| PPARG   | 5468   | ENST00000287820 | NM_015869.4    |
| PPFIBP1 | 8496   |                 |                |
| PPM1D   | 8493   | ENST00000305921 | NM_003620.3    |
| PPP1CB  | 5500   |                 |                |
| PPP2R1A | 5518   | ENST00000322088 | NM_014225.5    |
| PPP2R2A | 5520   |                 |                |
| PPP4R2  | 151987 | ENST00000356692 | NM_174907.2    |
| PPP6C   | 5537   | ENST00000373547 | NM_002721.4    |
| PRCC    | 5546   |                 |                |
| PRDM1   | 639    | ENST00000369096 | NM_001198.3    |
| PRDM14  | 63978  | ENST00000276594 | NM_024504.3    |
| PRDM16  | 63976  |                 |                |
| PREX2   | 80243  | ENST00000288368 | NM_024870.2    |
| PRF1    | 5551   |                 |                |
| PRKACA  | 5566   | ENST00000308677 | NM_002730.3    |
| PRKAR1A | 5573   | ENST00000358598 | NM_212471.2    |
| PRKCI   | 5584   | ENST00000295797 | NM_002740.5    |
| PRKD1   | 5587   | ENST00000331968 | NM_002742.2    |
| PRKDC   | 5591   |                 |                |
| PRRX1   | 5396   |                 |                |

|          |        |                 |                 |
|----------|--------|-----------------|-----------------|
| PRSS1    | 5644   | ENST00000311737 | NM_002769.4     |
| PRSS8    | 5652   |                 |                 |
| PSIP1    | 11168  |                 |                 |
| PTCH1    | 5727   | ENST00000331920 | NM_000264.3     |
| PTEN     | 5728   | ENST00000371953 | NM_000314.4     |
| PTK6     | 5753   |                 |                 |
| PTK7     | 5754   |                 |                 |
| PTP4A1   | 7803   | ENST00000370651 | NM_003463.4     |
| PTPN1    | 5770   | ENST00000371621 | NM_001278618.1  |
| PTPN11   | 5781   | ENST00000351677 | NM_002834.3     |
| PTPN13   | 5783   |                 |                 |
| PTPN2    | 5771   | ENST00000309660 | NM_002828.3     |
| PTPN6    | 5777   |                 |                 |
| PTPRB    | 5787   |                 |                 |
| PTPRC    | 5788   |                 |                 |
| PTPRD    | 5789   | ENST00000356435 | NM_002839.3     |
| PTPRK    | 5796   |                 |                 |
| PTPRO    | 5800   |                 |                 |
| PTPRS    | 5802   | ENST00000357368 | NM_002850.3     |
| PTPRT    | 11122  | ENST00000373198 | NM_133170.3     |
| QKI      | 9444   |                 |                 |
| RAB35    | 11021  | ENST00000229340 | NM_006861.6     |
| RABEP1   | 9135   |                 |                 |
| RAC1     | 5879   | ENST00000356142 | NM_018890.3     |
| RAC2     | 5880   | ENST00000249071 | NM_002872.4     |
| RAD21    | 5885   | ENST00000297338 | NM_006265.2     |
| RAD50    | 10111  | ENST00000265335 | NM_005732.3     |
| RAD51    | 5888   | ENST00000267868 | NM_002875.4     |
| RAD51B   | 5890   | ENST00000487270 | NM_133509.3     |
| RAD51C   | 5889   | ENST00000337432 | NM_058216.2     |
| RAD51D   | 5892   | ENST00000335858 | NM_133629.2     |
| RAD52    | 5893   | ENST00000358495 | NM_134424.2     |
| RAD54L   | 8438   | ENST00000371975 | NM_001142548.1  |
| RAF1     | 5894   | ENST00000251849 | NM_002880.3     |
| RALGDS   | 5900   |                 |                 |
| RANBP2   | 5903   |                 |                 |
| RAP1GDS1 | 5910   |                 |                 |
| RARA     | 5914   | ENST00000254066 | NM_000964.3     |
| RASA1    | 5921   | ENST00000274376 | NM_002890.2     |
| RASGEF1A | 221002 |                 |                 |
| RB1      | 5925   | ENST00000267163 | NM_000321.2     |
| RBM10    | 8241   | ENST00000329236 | NM_001204468.1  |
| RBM15    | 64783  | ENST00000369784 | NM_022768.4     |
| RECQL    | 5965   | ENST00000421138 | NM_032941.2     |
| RECQL4   | 9401   | ENST00000428558 | ENST00000428558 |
| REL      | 5966   | ENST00000295025 | NM_002908.2     |
| RELN     | 5649   | ENST00000428762 | NM_005045.3     |
| REST     | 5978   | ENST00000309042 | NM_001193508.1  |
| RET      | 5979   | ENST00000355710 | NM_020975.4     |
| RFWD2    | 64326  | ENST00000367669 | NM_022457.5     |
| RHEB     | 6009   | ENST00000262187 | NM_005614.3     |
| RHOA     | 387    | ENST00000418115 | NM_001664.2     |
| RHOH     | 399    |                 |                 |
| RICTOR   | 253260 | ENST00000357387 | NM_152756.3     |

|            |        |                 |                |
|------------|--------|-----------------|----------------|
| RIT1       | 6016   | ENST00000368323 | NM_006912.5    |
| RMI2       | 116028 |                 |                |
| RNF213     | 57674  |                 |                |
| RNF217-AS1 | 7955   |                 |                |
| RNF43      | 54894  | ENST00000407977 | NM_017763.4    |
| ROBO1      | 6091   | ENST00000464233 | NM_002941.3    |
| ROS1       | 6098   | ENST00000368508 | NM_002944.2    |
| RPL10      | 6134   |                 |                |
| RPL22      | 6146   |                 |                |
| RPL5       | 6125   |                 |                |
| RPN1       | 6184   |                 |                |
| RPS6KA4    | 8986   | ENST00000334205 | NM_003942.2    |
| RPS6KB2    | 6199   | ENST00000312629 | NM_003952.2    |
| RPTOR      | 57521  | ENST00000306801 | NM_020761.2    |
| RRAGC      | 64121  | ENST00000373001 | NM_022157.3    |
| RRAS       | 6237   | ENST00000246792 | NM_006270.3    |
| RRAS2      | 22800  | ENST00000256196 | NM_012250.5    |
| RSPO2      | 340419 |                 |                |
| RSPO3      | 84870  |                 |                |
| RTKL1      | 51750  | ENST00000508582 | NM_032957.4    |
| RUNX1      | 861    | ENST00000300305 | NM_001754.4    |
| RUNX1T1    | 862    | ENST00000265814 | NM_001198626.1 |
| RUNX2      | 860    |                 |                |
| RXRA       | 6256   | ENST00000481739 | NM_002957.4    |
| RYBP       | 23429  | ENST00000477973 | NM_012234.5    |
| S1PR2      | 9294   |                 |                |
| SALL4      | 57167  |                 |                |
| SAMHD1     | 25939  | ENST00000262878 | NM_015474.3    |
| SBDS       | 51119  |                 |                |
| SCG5       | 6447   | ENST00000300175 | NM_001144757.1 |
| SDC4       | 6385   |                 |                |
| SDHA       | 6389   | ENST00000264932 | NM_004168.2    |
| SDHAF2     | 54949  | ENST00000301761 | NM_017841.2    |
| SDHB       | 6390   | ENST00000375499 | NM_003000.2    |
| SDHC       | 6391   | ENST00000367975 | NM_003001.3    |
| SDHD       | 6392   | ENST00000375549 | NM_003002.3    |
| SEC31A     | 22872  |                 |                |
| SEPTIN5    | 5413   |                 |                |
| SEPTIN6    | 23157  |                 |                |
| SEPTIN9    | 10801  |                 |                |
| SERP2      | 387923 |                 |                |
| SERPINB3   | 6317   | ENST00000283752 | NM_006919.2    |
| SERPINB4   | 6318   | ENST00000341074 | NM_002974.3    |
| SESN1      | 27244  | ENST00000436639 | NM_014454.2    |
| SESN2      | 83667  | ENST00000253063 | NM_031459.4    |
| SESN3      | 143686 | ENST00000536441 | NM_144665.3    |
| SET        | 6418   |                 |                |
| SETBP1     | 26040  | ENST00000282030 | NM_015559.2    |
| SETD1A     | 9739   | ENST00000262519 | NM_014712.2    |
| SETD1B     | 23067  | ENST00000604567 | XM_005253858.3 |
| SETD2      | 29072  | ENST00000409792 | NM_014159.6    |
| SETD3      | 84193  | ENST00000331768 | NM_032233.2    |
| SETD4      | 54093  | ENST00000332131 | NM_017438.4    |
| SETD5      | 55209  | ENST00000402198 | NM_001080517.2 |

|         |        |                 |                |
|---------|--------|-----------------|----------------|
| SETD6   | 79918  | ENST00000219315 | NM_001160305.1 |
| SETD7   | 80854  | ENST00000274031 | NM_001306199.1 |
| SETDB1  | 9869   | ENST00000271640 | NM_001145415.1 |
| SETDB2  | 83852  | ENST00000354234 | NM_031915.2    |
| SF3B1   | 23451  | ENST00000335508 | NM_012433.2    |
| SFPQ    | 6421   |                 |                |
| SFRP1   | 6422   | ENST00000220772 | NM_003012.4    |
| SFRP2   | 6423   | ENST00000274063 | NM_003013.2    |
| SFRP4   | 6424   |                 |                |
| SGK1    | 6446   | ENST00000237305 | NM_005627.3    |
| SH2B3   | 10019  | ENST00000341259 | NM_005475.2    |
| SH2D1A  | 4068   | ENST00000371139 | NM_002351.4    |
| SH3GL1  | 6455   |                 |                |
| SHOC2   | 8036   | ENST00000369452 | NM_007373.3    |
| SHQ1    | 55164  | ENST00000325599 | NM_018130.2    |
| SIX1    | 6495   |                 |                |
| SLC1A2  | 6506   |                 |                |
| SLC34A2 | 10568  |                 |                |
| SLC45A3 | 85414  |                 |                |
| SLFN11  | 91607  | ENST00000308377 | NM_001104587.1 |
| SLX4    | 84464  | ENST00000294008 | NM_032444.2    |
| SMAD2   | 4087   | ENST00000262160 | NM_001003652.3 |
| SMAD3   | 4088   | ENST00000327367 | NM_005902.3    |
| SMAD4   | 4089   | ENST00000342988 | NM_005359.5    |
| SMARCA1 | 6594   |                 |                |
| SMARCA2 | 6595   | ENST00000349721 | NM_001289396.1 |
| SMARCA4 | 6597   | ENST00000344626 | NM_003072.3    |
| SMARCB1 | 6598   | ENST00000263121 | NM_003073.3    |
| SMARCD1 | 6602   | ENST00000394963 | NM_003076.4    |
| SMARCE1 | 6605   | ENST00000348513 | NM_003079.4    |
| SMC1A   | 8243   | ENST00000322213 | NM_006306.3    |
| SMC3    | 9126   | ENST00000361804 | NM_005445.3    |
| SMG1    | 23049  | ENST00000446231 | NM_015092.4    |
| SMO     | 6608   | ENST00000249373 | NM_005631.4    |
| SMYD3   | 64754  | ENST00000388985 | NM_001167740.1 |
| SNCAIP  | 9627   |                 |                |
| SND1    | 27044  |                 |                |
| SNX29   | 92017  |                 |                |
| SOCS1   | 8651   | ENST00000332029 | NM_003745.1    |
| SOCS2   | 8835   |                 |                |
| SOCS3   | 9021   | ENST00000330871 | NM_003955.4    |
| SOS1    | 6654   | ENST00000402219 | NM_005633.3    |
| SOX10   | 6663   |                 |                |
| SOX17   | 64321  | ENST00000297316 | NM_022454.3    |
| SOX2    | 6657   | ENST00000325404 | NM_003106.3    |
| SOX9    | 6662   | ENST00000245479 | NM_000346.3    |
| SP140   | 11262  | ENST00000392045 | NM_007237.4    |
| SPEN    | 23013  | ENST00000375759 | NM_015001.2    |
| SPOP    | 8405   | ENST00000347630 | NM_001007228.1 |
| SPRED1  | 161742 | ENST00000299084 | NM_152594.2    |
| SPRTN   | 83932  | ENST00000295050 | NM_032018.6    |
| SRC     | 6714   | ENST00000358208 | NM_198291.2    |
| SRSF2   | 6427   | ENST00000359995 | NM_003016.4    |
| SRSF3   | 6428   |                 |                |

|         |        |                 |                |
|---------|--------|-----------------|----------------|
| SS18    | 6760   | ENST00000415083 | NM_001007559.2 |
| SS18L1  | 26039  |                 |                |
| SSX1    | 6756   |                 |                |
| SSX2    | 6757   |                 |                |
| SSX4    | 6759   |                 |                |
| STAG1   | 10274  | ENST00000383202 | NM_005862.2    |
| STAG2   | 10735  | ENST00000218089 | NM_001042749.1 |
| STAT1   | 6772   | ENST00000361099 | NM_007315.3    |
| STAT2   | 6773   | ENST00000314128 | NM_005419.3    |
| STAT3   | 6774   | ENST00000264657 | NM_139276.2    |
| STAT4   | 6775   |                 |                |
| STAT5A  | 6776   | ENST00000345506 | NM_003152.3    |
| STAT5B  | 6777   | ENST00000293328 | NM_012448.3    |
| STAT6   | 6778   | ENST00000300134 | NM_001178078.1 |
| STIL    | 6491   |                 |                |
| STK11   | 6794   | ENST00000326873 | NM_000455.4    |
| STK19   | 8859   | ENST00000375331 | NM_004197.1    |
| STK40   | 83931  | ENST00000373129 | NM_032017.1    |
| STRN    | 6801   |                 |                |
| SUFU    | 51684  | ENST00000369902 | NM_016169.3    |
| SUZ12   | 23512  | ENST00000322652 | NM_015355.2    |
| SYK     | 6850   | ENST00000375746 | NM_003177.5    |
| TAF1    | 6872   |                 |                |
| TAF15   | 8148   |                 |                |
| TAL1    | 6886   | ENST00000294339 | NM_001287347.2 |
| TAL2    | 6887   |                 |                |
| TAP1    | 6890   | ENST00000354258 | NM_000593.5    |
| TAP2    | 6891   | ENST00000374899 | NM_018833.2    |
| TBL1XR1 | 79718  | ENST00000430069 | NM_024665.4    |
| TBX3    | 6926   | ENST00000257566 | NM_016569.3    |
| TCEA1   | 6917   |                 |                |
| TCEB1   | 6921   | ENST00000284811 | NM_005648.3    |
| TCF12   | 6938   |                 |                |
| TCF3    | 6929   | ENST00000344749 | NM_001136139.2 |
| TCF7L2  | 6934   | ENST00000543371 | NM_001146274.1 |
| TCL1A   | 8115   | ENST00000402399 | NM_001098725.1 |
| TCL1B   | 9623   | ENST00000340722 | NM_004918.3    |
| TEC     | 7006   |                 |                |
| TEK     | 7010   | ENST00000380036 | NM_000459.3    |
| TERC    | 7012   |                 |                |
| TERT    | 7015   | ENST00000310581 | NM_198253.2    |
| TET1    | 80312  | ENST00000373644 | NM_030625.2    |
| TET2    | 54790  | ENST00000380013 | NM_001127208.2 |
| TET3    | 200424 | ENST00000409262 | NM_144993      |
| TFE3    | 7030   | ENST00000315869 | NM_006521.5    |
| TFEB    | 7942   |                 |                |
| TFG     | 10342  |                 |                |
| TFPT    | 29844  |                 |                |
| TFRC    | 7037   |                 |                |
| TGFBR1  | 7046   | ENST00000374994 | NM_004612.2    |
| TGFBR2  | 7048   | ENST00000359013 | NM_001024847.2 |
| TIPARP  | 25976  |                 |                |
| TLE1    | 7088   | ENST00000376499 | NM_001303103.1 |
| TLE2    | 7089   | ENST00000262953 | NM_003260.4    |

|           |        |                 |                |
|-----------|--------|-----------------|----------------|
| TLE3      | 7090   | ENST00000558939 | NM_005078.3    |
| TLE4      | 7091   | ENST00000376552 | NM_007005.4    |
| TLL2      | 7093   |                 |                |
| TLX1      | 3195   | ENST00000370196 | NM_005521.3    |
| TLX3      | 30012  | ENST00000296921 | NM_021025.2    |
| TMEM127   | 55654  | ENST00000258439 | NM_001193304.2 |
| TMEM30A   | 55754  |                 |                |
| TMPRSS2   | 7113   | ENST00000398585 | NM_001135099.1 |
| TMSB4XP8  | 7117   |                 |                |
| TNFAIP3   | 7128   | ENST00000237289 | NM_006290.3    |
| TNFRSF11A | 8792   |                 |                |
| TNFRSF14  | 8764   | ENST00000355716 | NM_003820.2    |
| TNFRSF17  | 608    |                 |                |
| TOP1      | 7150   | ENST00000361337 | NM_003286.2    |
| TP53      | 7157   | ENST00000269305 | NM_000546.5    |
| TP53BP1   | 7158   | ENST00000382044 | NM_001141980.1 |
| TP63      | 8626   | ENST00000264731 | NM_003722.4    |
| TPM3      | 7170   |                 |                |
| TPM4      | 7171   |                 |                |
| TPR       | 7175   |                 |                |
| TRA       | 6955   |                 |                |
| TRAF2     | 7186   | ENST00000247668 | NM_021138.3    |
| TRAF3     | 7187   | ENST00000392745 | NM_003300.3    |
| TRAF5     | 7188   | ENST00000261464 | NM_001033910.2 |
| TRAF7     | 84231  | ENST00000326181 | NM_032271.2    |
| TRB       | 6957   |                 |                |
| TRD       | 6964   |                 |                |
| TRG       | 6965   |                 |                |
| TRIM24    | 8805   |                 |                |
| TRIM27    | 5987   |                 |                |
| TRIM33    | 51592  |                 |                |
| TRIP11    | 9321   |                 |                |
| TRIP13    | 9319   | ENST00000166345 | NM_004237.3    |
| TRRAP     | 8295   |                 |                |
| TSC1      | 7248   | ENST00000298552 | NM_000368.4    |
| TSC2      | 7249   | ENST00000219476 | NM_000548.3    |
| TSHR      | 7253   | ENST00000298171 | NM_000369.2    |
| TTL       | 150465 |                 |                |
| TUSC3     | 7991   |                 |                |
| TYK2      | 7297   | ENST00000264818 | NM_003331.4    |
| TYRO3     | 7301   |                 |                |
| U2AF1     | 7307   | ENST00000291552 | NM_006758.2    |
| U2AF2     | 11338  | ENST00000308924 | NM_007279.2    |
| UBR5      | 51366  | ENST00000520539 | NM_015902.5    |
| UPF1      | 5976   | ENST00000262803 | NM_002911.3    |
| USP6      | 9098   |                 |                |
| USP8      | 9101   | ENST00000307179 | NM_001128610.2 |
| VAV1      | 7409   | ENST00000602142 | NM_005428.3    |
| VAV2      | 7410   | ENST00000371850 | NM_001134398.1 |
| VEGFA     | 7422   | ENST00000523873 | NM_001171623.1 |
| VHL       | 7428   | ENST00000256474 | NM_000551.3    |
| VTCN1     | 79679  | ENST00000369458 | NM_024626.3    |
| WAS       | 7454   |                 |                |
| WDR90     | 197335 |                 |                |

|         |        |                 |                |
|---------|--------|-----------------|----------------|
| WHSC1   | 7468   | ENST00000382891 | NM_001042424.2 |
| WHSC1L1 | 54904  | ENST00000317025 | NM_023034.1    |
| WIF1    | 11197  | ENST00000286574 | NM_007191.4    |
| WRN     | 7486   |                 |                |
| WT1     | 7490   | ENST00000332351 | NM_024426.4    |
| WWTR1   | 25937  | ENST00000360632 | NM_001168280.1 |
| XBP1    | 7494   | ENST00000216037 | NM_005080.3    |
| XIAP    | 331    | ENST00000355640 | NM_001167.3    |
| XPA     | 7507   |                 |                |
| XPC     | 7508   |                 |                |
| XPO1    | 7514   | ENST00000401558 | NM_003400.3    |
| XRCC2   | 7516   | ENST00000359321 | NM_005431.1    |
| YAP1    | 10413  | ENST00000282441 | NM_001130145.2 |
| YES1    | 7525   | ENST00000314574 | NM_005433.3    |
| YPEL5   | 51646  |                 |                |
| YWHAE   | 7531   |                 |                |
| YY1     | 7528   | ENST00000262238 | NM_003403.4    |
| YY1AP1  | 55249  |                 |                |
| ZBTB16  | 7704   |                 |                |
| ZBTB20  | 26137  | ENST00000474710 | NM_001164342.2 |
| ZBTB7A  | 51341  |                 |                |
| ZFHX3   | 463    | ENST00000268489 | NM_006885.3    |
| ZFP36L1 | 677    | ENST00000336440 | NM_001244698.1 |
| ZMYM2   | 7750   |                 |                |
| ZMYM3   | 9203   |                 |                |
| ZNF217  | 7764   |                 |                |
| ZNF24   | 7572   |                 |                |
| ZNF278  | 23598  |                 |                |
| ZNF331  | 55422  |                 |                |
| ZNF384  | 171017 |                 |                |
| ZNF521  | 25925  |                 |                |
| ZNF703  | 80139  |                 |                |
| ZNRF3   | 84133  | ENST00000544604 | NM_001206998.1 |
| ZRSR2   | 8233   | ENST00000307771 | NM_005089.3    |

| # of occurrence within resources (Column D-J) | OncoKB Annotated | Is Oncogene | Is Tumor Suppressor Gene |
|-----------------------------------------------|------------------|-------------|--------------------------|
| 2                                             | No               | No          | No                       |
| 7                                             | Yes              | Yes         | No                       |
| 3                                             | Yes              | Yes         | No                       |
| 1                                             | No               | No          | No                       |
| 1                                             | No               | No          | No                       |
| 1                                             | No               | No          | No                       |
| 1                                             | No               | No          | No                       |
| 2                                             | Yes              | No          | Yes                      |
| 4                                             | Yes              | Yes         | No                       |
| 2                                             | No               | No          | No                       |
| 1                                             | No               | No          | No                       |
| 1                                             | No               | No          | No                       |
| 2                                             | No               | No          | No                       |
| 2                                             | No               | No          | No                       |
| 1                                             | No               | No          | No                       |
| 2                                             | No               | No          | No                       |
| 2                                             | Yes              | Yes         | No                       |
| 3                                             | Yes              | No          | No                       |
| 1                                             | Yes              | No          | Yes                      |
| 7                                             | Yes              | Yes         | No                       |
| 6                                             | Yes              | Yes         | No                       |
| 5                                             | Yes              | Yes         | No                       |
| 2                                             | Yes              | No          | No                       |
| 7                                             | Yes              | Yes         | No                       |
| 4                                             | Yes              | Yes         | Yes                      |
| 7                                             | Yes              | No          | Yes                      |
| 3                                             | Yes              | No          | Yes                      |
| 7                                             | Yes              | No          | Yes                      |
| 1                                             | No               | No          | No                       |
| 2                                             | Yes              | Yes         | Yes                      |
| 1                                             | No               | No          | No                       |
| 7                                             | Yes              | Yes         | No                       |
| 5                                             | Yes              | Yes         | No                       |
| 2                                             | No               | No          | No                       |
| 2                                             | No               | No          | No                       |
| 2                                             | Yes              | Yes         | Yes                      |
| 2                                             | No               | No          | No                       |
| 2                                             | Yes              | Yes         | No                       |
| 7                                             | Yes              | No          | Yes                      |
| 5                                             | Yes              | No          | Yes                      |
| 6                                             | Yes              | No          | Yes                      |
| 2                                             | Yes              | No          | Yes                      |
| 2                                             | Yes              | Yes         | No                       |
| 2                                             | Yes              | No          | No                       |
| 2                                             | Yes              | No          | Yes                      |
| 2                                             | Yes              | No          | Yes                      |
| 2                                             | Yes              | No          | No                       |
| 3                                             | Yes              | No          | Yes                      |
| 2                                             | No               | No          | No                       |
| 1                                             | No               | No          | No                       |
| 1                                             | No               | No          | No                       |
| 7                                             | Yes              | No          | Yes                      |
| 3                                             | Yes              | No          | Yes                      |



|   |     |     |     |
|---|-----|-----|-----|
| 3 | Yes | Yes | No  |
| 1 | No  | No  | No  |
| 2 | No  | No  | No  |
| 7 | Yes | No  | Yes |
| 1 | No  | No  | No  |
| 1 | No  | No  | No  |
| 2 | Yes | No  | No  |
| 2 | Yes | No  | Yes |
| 6 | Yes | No  | Yes |
| 7 | Yes | No  | Yes |
| 2 | Yes | No  | Yes |
| 2 | Yes | Yes | No  |
| 5 | Yes | Yes | No  |
| 5 | Yes | Yes | No  |
| 7 | Yes | No  | Yes |
| 4 | Yes | No  | Yes |
| 5 | Yes | Yes | No  |
| 6 | Yes | No  | Yes |
| 3 | Yes | No  | No  |
| 2 | Yes | No  | Yes |
| 7 | Yes | No  | Yes |
| 6 | Yes | No  | Yes |
| 1 | No  | No  | No  |
| 3 | Yes | No  | Yes |
| 5 | Yes | No  | Yes |
| 2 | No  | No  | No  |
| 4 | Yes | No  | Yes |
| 7 | Yes | Yes | No  |
| 4 | Yes | No  | No  |
| 3 | Yes | No  | Yes |
| 2 | No  | No  | No  |
| 2 | No  | No  | No  |
| 6 | Yes | Yes | No  |
| 2 | No  | No  | No  |
| 3 | Yes | Yes | No  |
| 1 | No  | No  | No  |
| 7 | Yes | No  | Yes |
| 5 | Yes | No  | Yes |
| 5 | Yes | Yes | No  |
| 5 | Yes | No  | No  |
| 5 | Yes | No  | Yes |
| 4 | Yes | No  | Yes |
| 7 | Yes | Yes | No  |
| 7 | Yes | No  | Yes |
| 7 | Yes | No  | Yes |
| 1 | No  | No  | No  |
| 6 | Yes | Yes | No  |
| 6 | Yes | No  | Yes |
| 1 | No  | No  | No  |
| 5 | Yes | No  | Yes |
| 2 | No  | No  | No  |
| 6 | Yes | Yes | No  |
| 1 | No  | No  | No  |
| 1 | No  | No  | No  |

|   |     |     |     |
|---|-----|-----|-----|
| 1 | No  | No  | No  |
| 1 | No  | No  | No  |
| 1 | No  | No  | No  |
| 6 | Yes | Yes | No  |
| 2 | No  | No  | No  |
| 1 | No  | No  | No  |
| 7 | Yes | Yes | No  |
| 3 | Yes | No  | No  |
| 2 | No  | No  | No  |
| 1 | No  | No  | No  |
| 6 | Yes | No  | Yes |
| 2 | No  | No  | No  |
| 6 | Yes | No  | Yes |
| 7 | Yes | No  | Yes |
| 1 | No  | No  | No  |
| 1 | No  | No  | No  |
| 1 | No  | No  | No  |
| 1 | No  | No  | No  |
| 1 | Yes | Yes | No  |
| 6 | Yes | Yes | No  |
| 6 | Yes | Yes | No  |
| 6 | Yes | Yes | No  |
| 6 | Yes | Yes | No  |
| 1 | No  | No  | No  |
| 2 | No  | No  | No  |
| 6 | Yes | Yes | No  |
| 3 | Yes | No  | No  |
| 2 | Yes | Yes | No  |
| 1 | No  | No  | No  |
| 3 | Yes | No  | Yes |
| 2 | No  | No  | No  |
| 2 | No  | No  | No  |
| 6 | Yes | Yes | No  |
| 6 | Yes | Yes | No  |
| 3 | Yes | Yes | No  |
| 7 | Yes | No  | Yes |
| 7 | Yes | No  | Yes |
| 1 | No  | No  | No  |
| 6 | Yes | No  | Yes |
| 6 | Yes | Yes | No  |
| 6 | Yes | Yes | No  |
| 5 | Yes | Yes | No  |
| 4 | Yes | No  | Yes |
| 6 | Yes | No  | Yes |
| 7 | Yes | No  | Yes |
| 5 | Yes | No  | Yes |
| 6 | Yes | No  | Yes |
| 2 | No  | No  | No  |
| 7 | Yes | No  | Yes |
| 3 | Yes | No  | No  |
| 1 | No  | No  | No  |
| 1 | No  | No  | No  |
| 1 | No  | No  | No  |

|   |     |     |     |
|---|-----|-----|-----|
| 5 | Yes | No  | Yes |
| 6 | Yes | No  | Yes |
| 1 | No  | No  | No  |
| 1 | No  | No  | No  |
| 7 | Yes | No  | Yes |
| 4 | Yes | No  | Yes |
| 1 | No  | No  | No  |
| 1 | No  | No  | No  |
| 1 | No  | No  | No  |
| 2 | No  | No  | No  |
| 2 | No  | No  | No  |
| 2 | Yes | No  | Yes |
| 1 | No  | No  | No  |
| 1 | No  | No  | No  |
| 2 | No  | No  | No  |
| 2 | No  | No  | No  |
| 1 | No  | No  | No  |
| 1 | No  | No  | No  |
| 2 | Yes | No  | Yes |
| 2 | Yes | Yes | No  |
| 2 | No  | No  | No  |
| 2 | No  | No  | No  |
| 7 | Yes | No  | Yes |
| 5 | Yes | Yes | No  |
| 6 | Yes | Yes | No  |
| 1 | No  | No  | No  |
| 1 | No  | No  | No  |
| 3 | Yes | No  | No  |
| 1 | No  | No  | No  |
| 6 | Yes | No  | No  |
| 6 | Yes | Yes | No  |
| 6 | Yes | No  | Yes |
| 3 | Yes | Yes | No  |
| 2 | No  | No  | No  |
| 7 | Yes | Yes | No  |
| 2 | Yes | No  | Yes |
| 4 | Yes | No  | No  |
| 1 | No  | No  | No  |
| 4 | Yes | No  | Yes |
| 6 | Yes | Yes | No  |
| 2 | Yes | Yes | No  |
| 5 | Yes | No  | Yes |
| 1 | No  | No  | No  |
| 2 | Yes | Yes | No  |
| 3 | Yes | No  | No  |
| 7 | Yes | No  | Yes |
| 1 | No  | No  | No  |
| 3 | Yes | No  | No  |
| 1 | No  | No  | No  |
| 3 | Yes | No  | No  |
| 1 | No  | No  | No  |
| 6 | Yes | Yes | No  |
| 2 | No  | No  | No  |
| 4 | Yes | No  | Yes |

|   |     |     |     |
|---|-----|-----|-----|
| 1 | Yes | Yes | No  |
| 1 | Yes | No  | Yes |
| 1 | No  | No  | No  |
| 2 | No  | No  | No  |
| 3 | Yes | Yes | No  |
| 4 | Yes | No  | Yes |
| 4 | Yes | No  | Yes |
| 1 | Yes | No  | No  |
| 1 | Yes | No  | No  |
| 1 | Yes | No  | No  |
| 1 | Yes | No  | No  |
| 4 | Yes | No  | No  |
| 2 | No  | No  | No  |
| 4 | Yes | Yes | No  |
| 7 | Yes | No  | Yes |
| 3 | Yes | No  | Yes |
| 5 | Yes | Yes | No  |
| 4 | Yes | No  | No  |
| 3 | Yes | No  | Yes |
| 1 | No  | No  | No  |
| 3 | Yes | No  | Yes |
| 3 | Yes | No  | Yes |
| 1 | No  | No  | No  |
| 3 | Yes | Yes | No  |
| 2 | No  | No  | No  |
| 2 | Yes | No  | Yes |
| 5 | Yes | No  | Yes |
| 3 | Yes | Yes | No  |
| 7 | Yes | Yes | No  |
| 2 | Yes | No  | Yes |
| 3 | Yes | No  | No  |
| 1 | No  | No  | No  |
| 5 | Yes | Yes | No  |
| 3 | Yes | Yes | No  |
| 3 | Yes | Yes | Yes |
| 2 | No  | No  | No  |
| 1 | No  | No  | No  |
| 2 | No  | No  | No  |
| 1 | Yes | No  | Yes |
| 1 | No  | No  | No  |
| 1 | No  | No  | No  |
| 2 | No  | No  | No  |
| 2 | No  | No  | No  |
| 7 | Yes | No  | Yes |
| 2 | Yes | No  | Yes |
| 4 | Yes | No  | No  |
| 3 | Yes | No  | Yes |
| 5 | Yes | No  | Yes |
| 4 | Yes | No  | No  |
| 4 | Yes | Yes | Yes |
| 5 | Yes | No  | Yes |
| 1 | No  | No  | No  |
| 2 | Yes | Yes | No  |
| 2 | No  | No  | No  |

|   |     |     |     |
|---|-----|-----|-----|
| 7 | Yes | Yes | No  |
| 6 | Yes | Yes | No  |
| 6 | Yes | Yes | No  |
| 1 | No  | No  | No  |
| 4 | Yes | No  | Yes |
| 4 | Yes | No  | Yes |
| 5 | Yes | No  | Yes |
| 4 | Yes | No  | Yes |
| 3 | Yes | No  | Yes |
| 6 | Yes | Yes | No  |
| 4 | Yes | No  | Yes |
| 2 | Yes | No  | Yes |
| 6 | Yes | Yes | No  |
| 2 | Yes | No  | Yes |
| 3 | Yes | No  | No  |
| 1 | No  | No  | No  |
| 5 | Yes | Yes | No  |
| 4 | Yes | Yes | No  |
| 4 | Yes | Yes | No  |
| 6 | Yes | No  | Yes |
| 4 | Yes | Yes | No  |
| 1 | No  | No  | No  |
| 1 | No  | No  | No  |
| 1 | No  | No  | No  |
| 3 | Yes | Yes | No  |
| 7 | Yes | Yes | Yes |
| 2 | No  | No  | No  |
| 1 | No  | No  | No  |
| 3 | Yes | No  | Yes |
| 6 | Yes | No  | Yes |
| 3 | Yes | No  | Yes |
| 6 | Yes | No  | Yes |
| 6 | Yes | No  | Yes |
| 4 | Yes | No  | Yes |
| 2 | No  | No  | No  |
| 2 | No  | No  | No  |
| 3 | No  | No  | No  |
| 2 | No  | No  | No  |
| 5 | Yes | No  | Yes |
| 4 | Yes | No  | Yes |
| 1 | No  | No  | No  |
| 4 | Yes | No  | Yes |
| 1 | No  | No  | No  |
| 7 | Yes | No  | Yes |
| 2 | No  | No  | No  |
| 2 | No  | No  | No  |
| 1 | No  | No  | No  |
| 3 | Yes | No  | No  |
| 2 | No  | No  | No  |
| 1 | No  | No  | No  |
| 2 | No  | No  | No  |
| 5 | Yes | Yes | No  |
| 2 | No  | No  | No  |
| 5 | Yes | Yes | No  |

|   |     |     |     |
|---|-----|-----|-----|
| 5 | Yes | Yes | No  |
| 2 | No  | No  | No  |
| 6 | Yes | Yes | No  |
| 2 | No  | No  | No  |
| 7 | Yes | Yes | No  |
| 7 | Yes | Yes | No  |
| 6 | Yes | Yes | No  |
| 5 | Yes | No  | Yes |
| 2 | No  | No  | No  |
| 1 | No  | No  | No  |
| 6 | Yes | No  | Yes |
| 3 | Yes | Yes | No  |
| 5 | Yes | Yes | No  |
| 7 | Yes | Yes | No  |
| 5 | Yes | Yes | No  |
| 1 | No  | No  | No  |
| 1 | No  | No  | No  |
| 4 | Yes | Yes | Yes |
| 2 | Yes | Yes | Yes |
| 7 | Yes | Yes | Yes |
| 5 | Yes | No  | Yes |
| 2 | No  | No  | No  |
| 2 | No  | No  | No  |
| 5 | Yes | Yes | Yes |
| 1 | No  | No  | No  |
| 2 | No  | No  | No  |
| 6 | Yes | No  | Yes |
| 2 | Yes | Yes | No  |
| 2 | No  | No  | No  |
| 3 | Yes | Yes | No  |
| 2 | Yes | Yes | No  |
| 2 | Yes | Yes | No  |
| 1 | No  | No  | No  |
| 1 | No  | No  | No  |
| 2 | No  | No  | No  |
| 6 | Yes | No  | No  |
| 6 | Yes | Yes | No  |
| 7 | Yes | Yes | Yes |
| 1 | No  | No  | No  |
| 1 | No  | No  | No  |
| 2 | No  | No  | No  |
| 4 | Yes | Yes | No  |
| 1 | No  | No  | No  |
| 7 | Yes | Yes | No  |
| 3 | Yes | Yes | No  |
| 4 | Yes | Yes | No  |
| 7 | Yes | Yes | No  |
| 7 | Yes | Yes | No  |
| 3 | Yes | Yes | No  |
| 1 | No  | No  | No  |
| 1 | No  | No  | No  |
| 1 | No  | No  | No  |
| 2 | No  | No  | No  |
| 3 | Yes | No  | Yes |

|   |     |     |     |
|---|-----|-----|-----|
| 3 | Yes | Yes | No  |
| 5 | Yes | No  | Yes |
| 1 | No  | No  | No  |
| 5 | Yes | Yes | No  |
| 2 | Yes | Yes | No  |
| 1 | No  | No  | No  |
| 6 | Yes | Yes | No  |
| 1 | Yes | No  | No  |
| 4 | Yes | No  | No  |
| 3 | Yes | No  | No  |
| 4 | Yes | Yes | No  |
| 3 | Yes | Yes | Yes |
| 3 | Yes | Yes | No  |
| 2 | No  | No  | No  |
| 2 | No  | No  | No  |
| 5 | Yes | Yes | No  |
| 3 | Yes | Yes | No  |
| 2 | No  | No  | No  |
| 1 | No  | No  | No  |
| 2 | Yes | No  | Yes |
| 4 | Yes | No  | No  |
| 3 | Yes | No  | Yes |
| 3 | Yes | Yes | No  |
| 3 | Yes | No  | No  |
| 3 | Yes | No  | No  |
| 3 | Yes | No  | No  |
| 3 | Yes | Yes | No  |
| 3 | Yes | No  | No  |
| 3 | Yes | No  | No  |
| 2 | Yes | No  | No  |
| 3 | Yes | No  | No  |
| 3 | Yes | No  | No  |
| 3 | Yes | No  | No  |
| 3 | Yes | No  | No  |
| 3 | Yes | No  | No  |
| 3 | Yes | No  | No  |
| 3 | Yes | No  | No  |
| 3 | Yes | No  | No  |
| 3 | Yes | No  | No  |
| 3 | Yes | No  | No  |
| 3 | Yes | No  | No  |
| 3 | Yes | No  | No  |
| 3 | Yes | No  | No  |
| 3 | Yes | No  | No  |
| 2 | No  | No  | No  |
| 1 | Yes | No  | No  |
| 3 | Yes | No  | No  |
| 3 | Yes | No  | No  |
| 3 | Yes | No  | No  |
| 4 | Yes | No  | Yes |
| 3 | Yes | No  | Yes |
| 2 | Yes | No  | Yes |
| 2 | No  | No  | No  |
| 2 | No  | No  | No  |
| 2 | No  | No  | No  |

|   |     |     |     |
|---|-----|-----|-----|
| 7 | Yes | No  | Yes |
| 1 | No  | No  | No  |
| 1 | No  | No  | No  |
| 2 | No  | No  | No  |
| 2 | No  | No  | No  |
| 1 | No  | No  | No  |
| 2 | No  | No  | No  |
| 3 | Yes | Yes | Yes |
| 2 | No  | No  | No  |
| 2 | No  | No  | No  |
| 2 | No  | No  | No  |
| 2 | No  | No  | No  |
| 7 | Yes | Yes | No  |
| 1 | No  | No  | No  |
| 2 | No  | No  | No  |
| 2 | No  | No  | No  |
| 1 | No  | No  | No  |
| 3 | Yes | Yes | No  |
| 5 | Yes | No  | Yes |
| 7 | Yes | Yes | No  |
| 7 | Yes | Yes | No  |
| 3 | Yes | No  | Yes |
| 3 | Yes | Yes | No  |
| 5 | Yes | Yes | No  |
| 3 | Yes | Yes | No  |
| 2 | No  | No  | No  |
| 2 | No  | No  | No  |
| 2 | No  | No  | No  |
| 1 | No  | No  | No  |
| 5 | Yes | Yes | No  |
| 6 | Yes | No  | No  |
| 1 | No  | No  | No  |
| 3 | Yes | Yes | Yes |
| 3 | Yes | No  | No  |
| 1 | No  | No  | No  |
| 2 | No  | No  | No  |
| 2 | Yes | Yes | No  |
| 1 | No  | No  | No  |
| 5 | Yes | Yes | No  |
| 3 | Yes | No  | Yes |
| 4 | Yes | Yes | Yes |
| 3 | Yes | No  | No  |
| 5 | Yes | No  | Yes |
| 1 | No  | No  | No  |
| 3 | Yes | No  | Yes |
| 3 | Yes | Yes | No  |
| 3 | Yes | No  | Yes |
| 1 | No  | No  | No  |
| 6 | Yes | Yes | No  |
| 3 | Yes | No  | Yes |
| 3 | Yes | Yes | No  |
| 5 | Yes | Yes | No  |
| 1 | No  | No  | No  |
| 2 | No  | No  | No  |



|   |     |     |     |
|---|-----|-----|-----|
| 7 | Yes | Yes | Yes |
| 7 | Yes | Yes | No  |
| 7 | Yes | Yes | No  |
| 3 | Yes | Yes | Yes |
| 1 | No  | No  | No  |
| 6 | Yes | Yes | No  |
| 3 | Yes | No  | No  |
| 1 | No  | No  | No  |
| 2 | Yes | No  | No  |
| 1 | No  | No  | No  |
| 1 | No  | No  | No  |
| 1 | No  | No  | No  |
| 6 | Yes | Yes | No  |
| 7 | Yes | No  | Yes |
| 7 | Yes | No  | Yes |
| 6 | Yes | Yes | No  |
| 2 | No  | No  | No  |
| 6 | Yes | No  | Yes |
| 1 | No  | No  | No  |
| 2 | No  | No  | No  |
| 7 | Yes | Yes | No  |
| 1 | Yes | No  | Yes |
| 5 | Yes | Yes | Yes |
| 2 | Yes | Yes | No  |
| 1 | No  | No  | No  |
| 2 | No  | No  | No  |
| 1 | No  | No  | No  |
| 6 | Yes | No  | Yes |
| 3 | Yes | No  | Yes |
| 6 | Yes | No  | Yes |
| 7 | Yes | No  | Yes |
| 3 | Yes | No  | No  |
| 3 | Yes | No  | No  |
| 7 | Yes | Yes | No  |
| 2 | Yes | Yes | No  |
| 1 | No  | No  | No  |
| 2 | No  | No  | No  |
| 4 | Yes | No  | Yes |
| 4 | Yes | No  | Yes |
| 3 | Yes | Yes | No  |
| 1 | No  | No  | No  |
| 2 | No  | No  | No  |
| 1 | No  | No  | No  |
| 1 | No  | No  | No  |
| 5 | Yes | Yes | No  |
| 3 | Yes | Yes | No  |
| 2 | No  | No  | No  |
| 1 | No  | No  | No  |
| 2 | No  | No  | No  |
| 1 | Yes | Yes | Yes |
| 1 | Yes | Yes | No  |
| 1 | No  | No  | No  |
| 2 | Yes | Yes | Yes |
| 1 | No  | No  | No  |

|   |     |     |     |
|---|-----|-----|-----|
| 2 | No  | No  | No  |
| 4 | Yes | Yes | No  |
| 3 | Yes | No  | Yes |
| 2 | Yes | Yes | Yes |
| 4 | Yes | No  | No  |
| 3 | Yes | Yes | No  |
| 1 | No  | No  | No  |
| 5 | Yes | No  | No  |
| 1 | No  | No  | No  |
| 7 | Yes | Yes | No  |
| 6 | Yes | Yes | No  |
| 6 | Yes | No  | Yes |
| 7 | Yes | No  | Yes |
| 5 | Yes | Yes | No  |
| 4 | Yes | Yes | No  |
| 1 | No  | No  | No  |
| 1 | No  | No  | No  |
| 6 | Yes | Yes | No  |
| 3 | Yes | Yes | No  |
| 3 | Yes | No  | No  |
| 4 | Yes | No  | Yes |
| 1 | Yes | No  | Yes |
| 5 | Yes | Yes | No  |
| 3 | Yes | No  | No  |
| 6 | Yes | Yes | No  |
| 6 | Yes | Yes | No  |
| 1 | No  | No  | No  |
| 3 | Yes | Yes | No  |
| 7 | Yes | Yes | Yes |
| 5 | Yes | Yes | No  |
| 1 | No  | No  | No  |
| 7 | Yes | No  | Yes |
| 1 | No  | No  | No  |
| 7 | Yes | Yes | No  |
| 3 | Yes | No  | Yes |
| 2 | Yes | Yes | No  |
| 1 | No  | No  | No  |
| 6 | Yes | Yes | Yes |
| 1 | No  | No  | No  |
| 1 | No  | No  | No  |
| 2 | No  | No  | No  |
| 7 | Yes | No  | Yes |
| 4 | Yes | No  | No  |
| 3 | Yes | Yes | No  |
| 1 | No  | No  | No  |
| 2 | No  | No  | No  |
| 2 | No  | No  | No  |
| 2 | No  | No  | No  |
| 1 | No  | No  | No  |
| 2 | Yes | No  | Yes |
| 2 | Yes | No  | No  |
| 7 | Yes | Yes | No  |
| 5 | Yes | No  | Yes |
| 2 | No  | No  | No  |

|   |     |     |     |
|---|-----|-----|-----|
| 7 | Yes | No  | Yes |
| 5 | Yes | No  | Yes |
| 7 | Yes | No  | Yes |
| 3 | Yes | Yes | No  |
| 5 | Yes | Yes | No  |
| 2 | No  | No  | No  |
| 3 | Yes | No  | Yes |
| 4 | Yes | Yes | No  |
| 3 | Yes | No  | Yes |
| 1 | No  | No  | No  |
| 6 | Yes | Yes | No  |
| 2 | No  | No  | No  |
| 6 | Yes | No  | Yes |
| 3 | No  | No  | No  |
| 6 | Yes | Yes | No  |
| 6 | Yes | Yes | No  |
| 6 | Yes | Yes | No  |
| 7 | Yes | Yes | No  |
| 2 | No  | No  | No  |
| 2 | No  | No  | No  |
| 1 | No  | No  | No  |
| 1 | No  | No  | No  |
| 4 | Yes | No  | No  |
| 1 | No  | No  | No  |
| 1 | No  | No  | No  |
| 2 | Yes | Yes | No  |
| 1 | No  | No  | No  |
| 5 | Yes | No  | Yes |
| 1 | No  | No  | No  |
| 2 | No  | No  | No  |
| 3 | Yes | Yes | No  |
| 1 | No  | No  | No  |
| 5 | Yes | No  | Yes |
| 4 | Yes | No  | No  |
| 3 | Yes | Yes | No  |
| 2 | No  | No  | No  |
| 3 | Yes | No  | No  |
| 7 | Yes | No  | Yes |
| 7 | Yes | No  | Yes |
| 1 | No  | No  | No  |
| 2 | Yes | Yes | No  |
| 7 | Yes | Yes | No  |
| 1 | No  | No  | No  |
| 2 | No  | No  | No  |
| 5 | Yes | No  | Yes |
| 1 | No  | No  | No  |
| 2 | No  | No  | No  |
| 6 | Yes | Yes | No  |
| 3 | Yes | No  | Yes |
| 1 | No  | No  | No  |
| 1 | No  | No  | No  |
| 7 | Yes | Yes | Yes |
| 7 | Yes | Yes | Yes |
| 4 | Yes | Yes | Yes |

|   |     |     |     |
|---|-----|-----|-----|
| 3 | Yes | Yes | Yes |
| 7 | Yes | No  | Yes |
| 3 | Yes | Yes | No  |
| 7 | Yes | Yes | No  |
| 2 | Yes | Yes | No  |
| 5 | Yes | Yes | Yes |
| 5 | Yes | Yes | No  |
| 3 | Yes | No  | Yes |
| 6 | Yes | Yes | No  |
| 5 | Yes | Yes | No  |
| 6 | Yes | Yes | No  |
| 3 | Yes | Yes | No  |
| 2 | No  | No  | No  |
| 2 | No  | No  | No  |
| 4 | Yes | No  | No  |
| 3 | Yes | Yes | No  |
| 3 | Yes | No  | No  |
| 2 | No  | No  | No  |
| 1 | No  | No  | No  |
| 1 | No  | No  | No  |
| 1 | No  | No  | No  |
| 5 | Yes | No  | Yes |
| 2 | No  | No  | No  |
| 1 | No  | No  | No  |
| 3 | Yes | Yes | No  |
| 1 | No  | No  | No  |
| 3 | Yes | Yes | No  |
| 6 | Yes | No  | Yes |
| 4 | Yes | No  | Yes |
| 4 | Yes | No  | Yes |
| 1 | No  | No  | No  |
| 1 | No  | No  | No  |
| 1 | No  | No  | No  |
| 2 | No  | No  | No  |
| 7 | Yes | No  | Yes |
| 2 | No  | No  | No  |
| 2 | Yes | Yes | No  |
| 7 | Yes | No  | Yes |
| 2 | No  | No  | No  |
| 1 | No  | No  | No  |
| 3 | Yes | No  | No  |
| 1 | No  | No  | No  |
| 2 | No  | No  | No  |
| 1 | No  | No  | No  |
| 5 | Yes | Yes | No  |
| 1 | No  | No  | No  |
| 6 | Yes | Yes | No  |
| 2 | No  | No  | No  |
| 3 | Yes | Yes | No  |
| 7 | Yes | Yes | No  |
| 6 | Yes | Yes | No  |
| 2 | No  | No  | No  |
| 3 | Yes | No  | No  |
| 2 | Yes | No  | Yes |

|   |     |     |     |
|---|-----|-----|-----|
| 2 | No  | No  | No  |
| 2 | Yes | Yes | No  |
| 3 | Yes | Yes | No  |
| 1 | No  | No  | No  |
| 6 | Yes | No  | Yes |
| 4 | Yes | No  | Yes |
| 2 | No  | No  | No  |
| 2 | Yes | No  | Yes |
| 1 | No  | No  | No  |
| 4 | Yes | No  | No  |
| 3 | Yes | No  | No  |
| 7 | Yes | Yes | No  |
| 5 | Yes | Yes | No  |
| 3 | Yes | Yes | No  |
| 4 | Yes | Yes | No  |
| 7 | Yes | No  | Yes |
| 4 | Yes | No  | Yes |
| 3 | Yes | No  | Yes |
| 6 | Yes | No  | No  |
| 2 | No  | No  | No  |
| 3 | Yes | Yes | No  |
| 4 | Yes | Yes | No  |
| 3 | Yes | No  | No  |
| 3 | Yes | No  | Yes |
| 2 | No  | No  | No  |
| 3 | Yes | No  | Yes |
| 5 | Yes | No  | Yes |
| 3 | Yes | No  | No  |
| 5 | Yes | No  | Yes |
| 5 | Yes | No  | Yes |
| 1 | No  | No  | No  |
| 5 | Yes | No  | Yes |
| 2 | No  | No  | No  |
| 1 | No  | No  | No  |
| 5 | Yes | Yes | No  |
| 1 | No  | No  | No  |
| 4 | Yes | Yes | No  |
| 1 | No  | No  | No  |
| 7 | Yes | No  | Yes |
| 1 | No  | No  | No  |
| 3 | Yes | No  | No  |
| 4 | Yes | No  | Yes |
| 1 | No  | No  | No  |
| 7 | Yes | No  | Yes |
| 3 | Yes | No  | No  |
| 2 | No  | No  | No  |
| 4 | Yes | No  | No  |
| 1 | No  | No  | No  |
| 2 | Yes | Yes | No  |
| 6 | Yes | No  | No  |
| 4 | Yes | Yes | No  |
| 3 | Yes | No  | No  |
| 1 | No  | No  | No  |
| 2 | No  | No  | No  |

|   |     |     |     |
|---|-----|-----|-----|
| 1 | Yes | No  | No  |
| 1 | No  | No  | No  |
| 2 | No  | No  | No  |
| 7 | Yes | No  | Yes |
| 7 | Yes | No  | Yes |
| 1 | No  | No  | No  |
| 1 | No  | No  | No  |
| 3 | Yes | No  | No  |
| 2 | Yes | Yes | Yes |
| 7 | Yes | Yes | No  |
| 1 | No  | No  | No  |
| 3 | Yes | No  | Yes |
| 1 | No  | No  | No  |
| 1 | No  | No  | No  |
| 1 | No  | No  | No  |
| 3 | Yes | No  | Yes |
| 1 | No  | No  | No  |
| 2 | No  | No  | No  |
| 3 | Yes | No  | Yes |
| 4 | Yes | No  | Yes |
| 2 | No  | No  | No  |
| 3 | Yes | Yes | No  |
| 2 | No  | No  | No  |
| 5 | Yes | Yes | No  |
| 3 | Yes | Yes | No  |
| 6 | Yes | No  | Yes |
| 4 | Yes | No  | Yes |
| 5 | Yes | No  | Yes |
| 5 | Yes | No  | Yes |
| 4 | Yes | No  | Yes |
| 4 | Yes | No  | Yes |
| 4 | Yes | No  | No  |
| 4 | Yes | No  | No  |
| 6 | Yes | Yes | No  |
| 1 | No  | No  | No  |
| 1 | No  | No  | No  |
| 2 | No  | No  | No  |
| 6 | Yes | No  | No  |
| 3 | Yes | No  | Yes |
| 1 | No  | No  | No  |
| 7 | Yes | No  | Yes |
| 5 | Yes | No  | Yes |
| 3 | Yes | Yes | Yes |
| 3 | Yes | No  | Yes |
| 4 | Yes | No  | Yes |
| 5 | Yes | Yes | No  |
| 2 | Yes | No  | No  |
| 2 | Yes | No  | Yes |
| 7 | Yes | Yes | No  |
| 3 | Yes | Yes | No  |
| 3 | Yes | Yes | No  |
| 5 | Yes | Yes | No  |
| 2 | No  | No  | No  |
| 5 | Yes | Yes | No  |

|   |     |     |     |
|---|-----|-----|-----|
| 3 | Yes | Yes | No  |
| 1 | No  | No  | No  |
| 2 | No  | No  | No  |
| 1 | No  | No  | No  |
| 7 | Yes | No  | Yes |
| 2 | Yes | No  | Yes |
| 6 | Yes | Yes | No  |
| 1 | No  | No  | No  |
| 2 | No  | No  | No  |
| 1 | No  | No  | No  |
| 2 | No  | No  | No  |
| 3 | Yes | Yes | No  |
| 3 | Yes | Yes | No  |
| 5 | Yes | Yes | No  |
| 3 | Yes | Yes | No  |
| 3 | Yes | Yes | No  |
| 3 | Yes | Yes | No  |
| 2 | No  | No  | No  |
| 1 | No  | No  | No  |
| 3 | Yes | No  | Yes |
| 6 | Yes | No  | Yes |
| 4 | Yes | Yes | No  |
| 1 | No  | No  | No  |
| 3 | Yes | No  | No  |
| 3 | Yes | No  | Yes |
| 1 | No  | No  | No  |
| 1 | No  | No  | No  |
| 2 | Yes | No  | Yes |
| 1 | No  | No  | No  |
| 2 | Yes | Yes | No  |
| 2 | No  | No  | No  |
| 6 | Yes | No  | Yes |
| 4 | Yes | No  | Yes |
| 6 | Yes | No  | Yes |
| 6 | Yes | No  | Yes |
| 6 | Yes | No  | Yes |
| 1 | No  | No  | No  |
| 1 | No  | No  | No  |
| 1 | No  | No  | No  |
| 1 | No  | No  | No  |
| 1 | No  | No  | No  |
| 2 | Yes | Yes | Yes |
| 2 | Yes | No  | No  |
| 3 | Yes | No  | Yes |
| 3 | Yes | No  | Yes |
| 3 | Yes | No  | Yes |
| 2 | No  | No  | No  |
| 5 | Yes | Yes | No  |
| 2 | Yes | Yes | No  |
| 2 | Yes | No  | No  |
| 7 | Yes | No  | Yes |
| 2 | Yes | No  | No  |
| 2 | Yes | No  | No  |
| 2 | Yes | No  | No  |

|   |     |     |     |
|---|-----|-----|-----|
| 2 | Yes | No  | No  |
| 2 | Yes | No  | No  |
| 3 | Yes | Yes | Yes |
| 2 | Yes | No  | Yes |
| 7 | Yes | Yes | No  |
| 1 | No  | No  | No  |
| 1 | Yes | No  | Yes |
| 1 | Yes | Yes | Yes |
| 1 | No  | No  | No  |
| 4 | Yes | Yes | No  |
| 4 | Yes | No  | Yes |
| 3 | Yes | No  | Yes |
| 2 | No  | No  | No  |
| 3 | Yes | Yes | No  |
| 3 | Yes | No  | Yes |
| 1 | No  | No  | No  |
| 1 | No  | No  | No  |
| 2 | No  | No  | No  |
| 1 | No  | No  | No  |
| 2 | Yes | No  | Yes |
| 3 | Yes | No  | Yes |
| 7 | Yes | No  | Yes |
| 4 | Yes | No  | Yes |
| 7 | Yes | No  | Yes |
| 1 | No  | No  | No  |
| 2 | Yes | No  | Yes |
| 7 | Yes | No  | Yes |
| 7 | Yes | No  | Yes |
| 4 | Yes | No  | No  |
| 3 | Yes | Yes | Yes |
| 3 | Yes | No  | Yes |
| 3 | Yes | No  | Yes |
| 2 | Yes | No  | Yes |
| 7 | Yes | Yes | No  |
| 3 | Yes | Yes | No  |
| 1 | No  | No  | No  |
| 1 | No  | No  | No  |
| 1 | No  | No  | No  |
| 7 | Yes | No  | Yes |
| 1 | No  | No  | No  |
| 2 | Yes | No  | Yes |
| 3 | Yes | Yes | No  |
| 1 | No  | No  | No  |
| 3 | Yes | No  | Yes |
| 6 | Yes | Yes | No  |
| 5 | Yes | Yes | Yes |
| 2 | Yes | No  | Yes |
| 6 | Yes | No  | Yes |
| 7 | Yes | No  | Yes |
| 3 | Yes | No  | Yes |
| 2 | Yes | No  | Yes |
| 6 | Yes | Yes | No  |
| 6 | Yes | No  | No  |
| 2 | No  | No  | No  |



|   |     |     |     |
|---|-----|-----|-----|
| 3 | Yes | Yes | No  |
| 1 | No  | No  | No  |
| 2 | No  | No  | No  |
| 2 | No  | No  | No  |
| 2 | No  | No  | No  |
| 2 | Yes | No  | Yes |
| 7 | Yes | No  | Yes |
| 1 | Yes | No  | No  |
| 1 | Yes | No  | No  |
| 6 | Yes | Yes | No  |
| 1 | No  | No  | No  |
| 4 | Yes | Yes | No  |
| 5 | Yes | Yes | No  |
| 4 | Yes | Yes | No  |
| 1 | No  | No  | No  |
| 7 | Yes | No  | Yes |
| 3 | Yes | Yes | No  |
| 3 | Yes | No  | No  |
| 1 | No  | No  | No  |
| 6 | Yes | No  | Yes |
| 5 | Yes | No  | Yes |
| 6 | Yes | Yes | No  |
| 1 | No  | No  | No  |
| 2 | No  | No  | No  |
| 3 | Yes | Yes | No  |
| 2 | No  | No  | No  |
| 3 | Yes | No  | No  |
| 3 | Yes | No  | No  |
| 4 | Yes | No  | Yes |
| 5 | Yes | No  | Yes |
| 1 | No  | No  | No  |
| 3 | Yes | No  | No  |
| 1 | No  | No  | No  |
| 5 | Yes | No  | Yes |
| 4 | Yes | No  | Yes |
| 3 | Yes | Yes | No  |
| 1 | Yes | Yes | No  |
| 1 | No  | No  | No  |
| 4 | Yes | No  | No  |
| 1 | No  | No  | No  |
| 5 | Yes | Yes | No  |
| 5 | Yes | No  | Yes |
| 7 | Yes | No  | Yes |
| 2 | Yes | No  | Yes |
| 3 | Yes | Yes | No  |
| 1 | No  | No  | No  |
| 2 | No  | No  | No  |
| 1 | No  | No  | No  |
| 1 | No  | No  | No  |
| 3 | Yes | No  | Yes |
| 6 | Yes | No  | Yes |
| 1 | No  | No  | No  |
| 1 | Yes | No  | No  |
| 1 | Yes | No  | No  |

|   |     |     |     |
|---|-----|-----|-----|
| 1 | Yes | No  | No  |
| 1 | Yes | No  | No  |
| 1 | No  | No  | No  |
| 3 | Yes | Yes | No  |
| 3 | Yes | Yes | No  |
| 4 | Yes | No  | Yes |
| 1 | No  | No  | No  |
| 6 | Yes | No  | No  |
| 1 | No  | No  | No  |
| 7 | Yes | No  | Yes |
| 1 | No  | No  | No  |
| 6 | Yes | No  | Yes |
| 2 | No  | No  | No  |
| 5 | Yes | No  | Yes |
| 7 | Yes | No  | Yes |
| 3 | Yes | No  | Yes |
| 5 | Yes | Yes | Yes |
| 2 | No  | No  | No  |
| 2 | No  | No  | No  |
| 1 | No  | No  | No  |
| 2 | Yes | Yes | No  |
| 4 | Yes | No  | No  |
| 3 | Yes | No  | Yes |
| 3 | Yes | No  | Yes |
| 5 | Yes | No  | No  |
| 2 | Yes | Yes | No  |
| 2 | Yes | Yes | No  |
| 2 | Yes | Yes | No  |
| 2 | No  | No  | No  |
| 1 | No  | No  | No  |
| 1 | No  | No  | No  |
| 2 | No  | No  | No  |
| 2 | Yes | Yes | Yes |
| 1 | No  | No  | No  |
| 7 | Yes | No  | Yes |
| 6 | Yes | No  | Yes |
| 6 | Yes | Yes | No  |
| 1 | No  | No  | No  |
| 1 | No  | No  | No  |
| 3 | Yes | Yes | No  |
| 1 | No  | No  | No  |
| 7 | Yes | Yes | No  |
| 3 | Yes | No  | No  |
| 3 | Yes | Yes | No  |
| 3 | Yes | No  | No  |
| 2 | No  | No  | No  |
| 3 | Yes | Yes | No  |
| 2 | Yes | Yes | No  |
| 2 | Yes | Yes | No  |
| 4 | Yes | Yes | No  |
| 7 | Yes | No  | Yes |
| 3 | Yes | No  | No  |
| 1 | No  | No  | No  |
| 1 | No  | No  | No  |

|   |     |     |     |
|---|-----|-----|-----|
| 6 | Yes | Yes | No  |
| 6 | Yes | No  | No  |
| 2 | Yes | No  | Yes |
| 1 | No  | No  | No  |
| 7 | Yes | Yes | Yes |
| 4 | Yes | Yes | No  |
| 3 | Yes | Yes | No  |
| 3 | Yes | Yes | No  |
| 1 | No  | No  | No  |
| 1 | No  | No  | No  |
| 6 | Yes | Yes | No  |
| 4 | Yes | No  | Yes |
| 3 | Yes | Yes | No  |
| 3 | Yes | Yes | No  |
| 1 | No  | No  | No  |
| 1 | No  | No  | No  |
| 1 | Yes | Yes | No  |
| 1 | No  | No  | No  |
| 2 | No  | No  | No  |
| 1 | Yes | Yes | Yes |
| 1 | No  | No  | No  |
| 4 | Yes | No  | Yes |
| 1 | Yes | No  | Yes |
| 2 | No  | No  | No  |
| 1 | No  | No  | No  |
| 2 | No  | No  | No  |
| 1 | No  | No  | No  |
| 1 | No  | No  | No  |
| 1 | No  | No  | No  |
| 2 | No  | No  | No  |
| 2 | No  | No  | No  |
| 2 | No  | No  | No  |
| 2 | Yes | No  | Yes |
| 5 | Yes | No  | No  |

| MSK-IMPACT | MSK-HEME | FOUNDATION ONE | FOUNDATION ONE HEME | Vogelstein |
|------------|----------|----------------|---------------------|------------|
| No         | No       | No             | Yes                 | No         |
| Yes        | Yes      | Yes            | Yes                 | Yes        |
| No         | No       | No             | Yes                 | No         |
| No         | No       | No             | No                  | No         |
| No         | No       | No             | No                  | No         |
| No         | No       | No             | Yes                 | No         |
| No         | No       | No             | Yes                 | No         |
| No         | Yes      | No             | No                  | No         |
| Yes        | Yes      | No             | No                  | No         |
| No         | No       | Yes            | No                  | Yes        |
| No         | No       | No             | No                  | No         |
| No         | No       | No             | Yes                 | No         |
| No         | No       | No             | Yes                 | No         |
| No         | No       | No             | Yes                 | No         |
| No         | No       | No             | No                  | No         |
| No         | No       | No             | Yes                 | No         |
| Yes        | No       | No             | No                  | No         |
| Yes        | Yes      | No             | No                  | No         |
| No         | No       | No             | No                  | No         |
| Yes        | Yes      | Yes            | Yes                 | Yes        |
| Yes        | Yes      | Yes            | Yes                 | No         |
| Yes        | Yes      | Yes            | Yes                 | No         |
| Yes        | No       | No             | No                  | No         |
| Yes        | Yes      | Yes            | Yes                 | Yes        |
| Yes        | Yes      | Yes            | Yes                 | Yes        |
| Yes        | Yes      | Yes            | No                  | No         |
| Yes        | Yes      | Yes            | Yes                 | Yes        |
| Yes        | Yes      | No             | No                  | No         |
| Yes        | Yes      | Yes            | Yes                 | Yes        |
| No         | No       | No             | Yes                 | No         |
| Yes        | No       | No             | No                  | No         |
| No         | No       | No             | No                  | No         |
| Yes        | Yes      | Yes            | Yes                 | Yes        |
| Yes        | Yes      | Yes            | Yes                 | No         |
| No         | No       | Yes            | Yes                 | No         |
| No         | No       | No             | Yes                 | No         |
| Yes        | No       | No             | No                  | No         |
| No         | No       | No             | Yes                 | No         |
| No         | Yes      | No             | No                  | No         |
| Yes        | Yes      | Yes            | Yes                 | Yes        |
| Yes        | Yes      | No             | No                  | Yes        |
| Yes        | Yes      | No             | Yes                 | Yes        |
| No         | Yes      | No             | No                  | No         |
| No         | Yes      | No             | No                  | No         |
| No         | Yes      | No             | No                  | No         |
| No         | Yes      | No             | No                  | No         |
| No         | Yes      | No             | No                  | No         |
| Yes        | Yes      | No             | No                  | No         |
| No         | No       | No             | Yes                 | No         |
| No         | No       | No             | Yes                 | No         |
| No         | No       | No             | No                  | No         |
| Yes        | Yes      | Yes            | Yes                 | Yes        |
| Yes        | Yes      | No             | No                  | No         |

|     |     |     |     |     |
|-----|-----|-----|-----|-----|
| No  | No  | No  | Yes | No  |
| No  | No  | No  | Yes | No  |
| No  | No  | No  | Yes | No  |
| Yes | Yes | Yes | Yes | Yes |
| No  | No  | No  | No  | No  |
| No  | No  | No  | No  | No  |
| No  | Yes | No  | No  | No  |
| No  | Yes | No  | No  | No  |
| Yes | Yes | Yes | Yes | No  |
| Yes | Yes | Yes | Yes | Yes |
| No  | Yes | No  | No  | No  |
| Yes | No  | No  | No  | No  |
| Yes | Yes | Yes | Yes | No  |
| Yes | Yes | Yes | Yes | No  |
| Yes | Yes | Yes | Yes | Yes |
| Yes | Yes | Yes | Yes | Yes |
| Yes | Yes | No  | No  | No  |
| Yes | Yes | Yes | Yes | No  |
| Yes | Yes | No  | Yes | Yes |
| Yes | Yes | No  | No  | No  |
| Yes | Yes | No  | No  | No  |
| No  | Yes | No  | No  | No  |
| Yes | Yes | Yes | Yes | Yes |
| Yes | Yes | Yes | Yes | No  |
| Yes | Yes | Yes | No  | No  |
| Yes | Yes | No  | Yes | No  |
| Yes | Yes | No  | Yes | No  |
| Yes | Yes | No  | Yes | No  |
| Yes | Yes | Yes | Yes | No  |
| Yes | Yes | Yes | Yes | No  |
| Yes | Yes | Yes | Yes | No  |
| Yes | Yes | Yes | Yes | Yes |
| Yes | Yes | Yes | Yes | Yes |
| No  | No  | No  | No  | No  |
| Yes | Yes | Yes | Yes | No  |
| Yes | Yes | Yes | Yes | No  |
| No  | No  | No  | Yes | No  |
| No  | Yes | Yes | Yes | No  |
| No  | No  | Yes | Yes | No  |
| Yes | Yes | Yes | Yes | No  |
| No  | No  | No  | Yes | No  |
| No  | No  | No  | No  | No  |



|     |     |     |     |     |
|-----|-----|-----|-----|-----|
| Yes | Yes | Yes | Yes | No  |
| Yes | Yes | Yes | Yes | No  |
| No  | No  | No  | Yes | No  |
| No  | No  | No  | Yes | No  |
| Yes | Yes | Yes | Yes | Yes |
| No  | Yes | No  | Yes | No  |
| No  | No  | No  | Yes | No  |
| No  | No  | No  | No  | No  |
| No  | No  | No  | Yes | No  |
| No  | No  | No  | Yes | No  |
| No  | No  | No  | Yes | No  |
| Yes | No  | No  | No  | No  |
| No  | No  | No  | No  | No  |
| No  | No  | No  | No  | No  |
| No  | No  | No  | Yes | No  |
| No  | No  | No  | Yes | No  |
| No  | No  | No  | Yes | No  |
| No  | No  | No  | No  | No  |
| No  | No  | No  | Yes | No  |
| No  | Yes | No  | No  | No  |
| No  | No  | No  | No  | No  |
| No  | No  | No  | Yes | No  |
| Yes | Yes | Yes | Yes | No  |
| Yes | Yes | Yes | Yes | Yes |
| Yes | Yes | No  | Yes | Yes |
| No  | No  | No  | No  | No  |
| No  | No  | No  | No  | No  |
| Yes | Yes | No  | No  | No  |
| No  | No  | No  | Yes | No  |
| Yes | Yes | Yes | Yes | Yes |
| Yes | Yes | Yes | Yes | Yes |
| Yes | Yes | Yes | Yes | No  |
| Yes | Yes | Yes | Yes | No  |
| Yes | Yes | No  | No  | No  |
| No  | No  | Yes | Yes | No  |
| Yes | Yes | Yes | Yes | Yes |
| Yes | No  | No  | No  | No  |
| Yes | Yes | No  | No  | Yes |
| No  | No  | Yes | No  | No  |
| Yes | No  | No  | No  | No  |
| Yes | Yes | No  | No  | No  |
| Yes | Yes | Yes | Yes | Yes |
| No  | No  | No  | No  | No  |
| Yes | Yes | No  | No  | No  |
| No  | No  | No  | No  | No  |
| No  | No  | No  | Yes | No  |
| No  | No  | Yes | No  | No  |
| Yes | Yes | Yes | Yes | No  |
| No  | No  | No  | Yes | No  |
| No  | Yes | No  | Yes | No  |

|     |     |     |     |     |
|-----|-----|-----|-----|-----|
| No  | No  | No  | No  | No  |
| No  | No  | No  | No  | No  |
| No  | No  | No  | No  | No  |
| No  | No  | No  | Yes | No  |
| No  | No  | No  | Yes | No  |
| Yes | Yes | No  | No  | No  |
| Yes | Yes | Yes | No  | No  |
| No  | No  | No  | No  | No  |
| No  | No  | No  | No  | No  |
| No  | No  | No  | No  | No  |
| No  | No  | No  | No  | No  |
| Yes | Yes | No  | No  | No  |
| No  | No  | No  | Yes | No  |
| Yes | Yes | No  | No  | Yes |
| Yes | Yes | Yes | Yes | Yes |
| Yes | Yes | No  | No  | No  |
| Yes | Yes | Yes | Yes | No  |
| Yes | Yes | No  | No  | No  |
| No  | Yes | No  | Yes | No  |
| No  | No  | No  | Yes | No  |
| No  | Yes | No  | Yes | No  |
| Yes | Yes | No  | No  | No  |
| No  | No  | No  | Yes | No  |
| Yes | Yes | No  | No  | No  |
| Yes | Yes | No  | No  | No  |
| Yes | Yes | No  | Yes | No  |
| No  | No  | No  | No  | No  |
| No  | No  | No  | No  | No  |
| No  | No  | No  | Yes | No  |
| No  | No  | No  | Yes | No  |
| No  | No  | No  | Yes | No  |
| No  | No  | No  | Yes | No  |
| No  | No  | Yes | Yes | No  |
| Yes | Yes | Yes | Yes | Yes |
| No  | Yes | No  | No  | No  |
| Yes | Yes | No  | No  | No  |
| Yes | Yes | No  | No  | No  |
| Yes | Yes | Yes | Yes | No  |
| Yes | Yes | No  | Yes | No  |
| Yes | Yes | No  | Yes | No  |
| Yes | Yes | Yes | Yes | No  |
| No  | No  | Yes | No  | No  |
| No  | No  | No  | Yes | No  |
| No  | No  | No  | Yes | No  |



|     |     |     |     |     |
|-----|-----|-----|-----|-----|
| Yes | Yes | Yes | Yes | Yes |
| Yes | Yes | Yes | Yes | No  |
| Yes | Yes | Yes | Yes | No  |
| No  | No  | No  | No  | No  |
| Yes | Yes | No  | No  | No  |
| Yes | Yes | No  | No  | No  |
| Yes | Yes | Yes | No  | No  |
| Yes | Yes | No  | No  | No  |
| Yes | Yes | No  | No  | No  |
| Yes | Yes | Yes | Yes | No  |
| Yes | Yes | Yes | No  | No  |
| No  | Yes | No  | No  | No  |
| Yes | Yes | Yes | Yes | No  |
| Yes | No  | No  | No  | No  |
| No  | Yes | No  | No  | No  |
| No  | No  | No  | Yes | No  |
| Yes | Yes | No  | Yes | No  |
| No  | No  | Yes | Yes | No  |
| No  | No  | Yes | Yes | No  |
| Yes | Yes | Yes | Yes | No  |
| No  | No  | No  | Yes | No  |
| No  | No  | No  | No  | No  |
| No  | No  | No  | No  | No  |
| Yes | Yes | No  | No  | No  |
| Yes | Yes | Yes | Yes | Yes |
| No  | No  | Yes | No  | No  |
| No  | No  | No  | Yes | No  |
| Yes | Yes | No  | Yes | No  |
| Yes | Yes | Yes | Yes | No  |
| Yes | Yes | No  | No  | No  |
| Yes | Yes | Yes | Yes | No  |
| Yes | Yes | Yes | Yes | No  |
| No  | Yes | No  | Yes | No  |
| No  | No  | No  | Yes | No  |
| No  | No  | No  | Yes | No  |
| No  | No  | Yes | Yes | No  |
| No  | No  | Yes | Yes | No  |
| No  | Yes | Yes | Yes | No  |
| Yes | Yes | No  | No  | No  |
| No  | No  | No  | No  | No  |
| No  | Yes | No  | Yes | No  |
| No  | No  | No  | Yes | No  |
| Yes | Yes | Yes | Yes | Yes |
| No  | No  | No  | Yes | No  |
| No  | No  | No  | Yes | No  |
| No  | No  | No  | No  | No  |
| No  | No  | No  | Yes | No  |
| No  | No  | Yes | Yes | No  |
| No  | No  | Yes | No  | No  |
| No  | No  | Yes | Yes | No  |
| Yes | Yes | Yes | Yes | No  |
| No  | No  | Yes | Yes | No  |
| Yes | Yes | Yes | Yes | No  |

|     |     |     |     |     |
|-----|-----|-----|-----|-----|
| Yes | Yes | Yes | Yes | No  |
| No  | No  | Yes | Yes | No  |
| Yes | Yes | Yes | Yes | No  |
| No  | No  | No  | Yes | No  |
| Yes | Yes | Yes | Yes | Yes |
| Yes | Yes | Yes | Yes | Yes |
| Yes | Yes | Yes | Yes | No  |
| Yes | Yes | Yes | No  | No  |
| No  | No  | No  | Yes | No  |
| No  | No  | No  | No  | No  |
| Yes | Yes | Yes | Yes | No  |
| No  | No  | No  | Yes | No  |
| Yes | Yes | Yes | Yes | No  |
| Yes | Yes | Yes | Yes | Yes |
| Yes | Yes | No  | Yes | No  |
| No  | No  | No  | Yes | No  |
| No  | No  | No  | Yes | No  |
| Yes | Yes | No  | No  | No  |
| Yes | No  | No  | No  | No  |
| Yes | Yes | Yes | Yes | Yes |
| Yes | Yes | No  | Yes | No  |
| No  | No  | No  | Yes | No  |
| No  | No  | No  | Yes | No  |
| Yes | Yes | No  | Yes | No  |
| Yes | Yes | No  | Yes | Yes |
| Yes | Yes | Yes | Yes | Yes |
| No  | No  | Yes | No  | No  |
| No  | No  | Yes | No  | No  |
| No  | No  | Yes | Yes | No  |
| Yes | Yes | No  | Yes | No  |
| No  | No  | No  | Yes | No  |
| Yes | Yes | Yes | Yes | Yes |
| No  | Yes | No  | Yes | No  |
| No  | Yes | Yes | Yes | No  |
| Yes | Yes | Yes | Yes | Yes |
| Yes | Yes | Yes | Yes | Yes |
| Yes | Yes | No  | No  | No  |
| No  | No  | No  | No  | No  |
| No  | No  | No  | No  | No  |
| No  | No  | No  | No  | No  |
| No  | No  | No  | Yes | No  |
| Yes | Yes | No  | No  | No  |





|     |     |     |     |     |
|-----|-----|-----|-----|-----|
| Yes | Yes | Yes | Yes | Yes |
| Yes | Yes | Yes | Yes | Yes |
| Yes | Yes | Yes | Yes | Yes |
| No  | Yes | No  | Yes | No  |
| No  | No  | No  | Yes | No  |
| Yes | Yes | Yes | Yes | No  |
| No  | No  | No  | Yes | No  |
| No  | No  | No  | No  | No  |
| Yes | No  | No  | No  | No  |
| No  | No  | No  | No  | No  |
| No  | No  | No  | Yes | No  |
| No  | No  | No  | Yes | No  |
| Yes | Yes | Yes | Yes | No  |
| Yes | Yes | Yes | Yes | Yes |
| Yes | Yes | Yes | Yes | Yes |
| Yes | Yes | Yes | Yes | No  |
| No  | No  | No  | Yes | No  |
| Yes | Yes | Yes | Yes | No  |
| No  | No  | Yes | No  | No  |
| No  | No  | No  | Yes | No  |
| Yes | Yes | Yes | Yes | Yes |
| No  | No  | No  | No  | No  |
| Yes | Yes | No  | No  | Yes |
| Yes | No  | No  | No  | No  |
| No  | No  | No  | No  | No  |
| No  | No  | Yes | Yes | No  |
| Yes | Yes | Yes | Yes | No  |
| Yes | Yes | No  | No  | No  |
| Yes | Yes | No  | Yes | Yes |
| Yes | Yes | Yes | Yes | Yes |
| Yes | Yes | No  | No  | No  |
| Yes | Yes | No  | No  | No  |
| Yes | Yes | Yes | Yes | Yes |
| No  | Yes | No  | No  | No  |
| No  | No  | No  | No  | No  |
| No  | No  | No  | Yes | No  |
| Yes | Yes | No  | No  | No  |
| Yes | Yes | No  | No  | No  |
| No  | Yes | No  | No  | No  |
| No  | No  | No  | Yes | No  |
| No  | No  | No  | Yes | No  |
| No  | No  | No  | No  | No  |
| No  | No  | No  | No  | No  |
| No  | No  | No  | No  | No  |
| No  | No  | No  | No  | No  |
| No  | No  | No  | No  | No  |
| No  | No  | No  | No  | No  |
| No  | No  | No  | Yes | No  |
| No  | Yes | No  | No  | No  |
| No  | No  | Yes | No  | No  |

|     |     |     |     |     |
|-----|-----|-----|-----|-----|
| No  | No  | No  | Yes | No  |
| Yes | Yes | Yes | No  | No  |
| Yes | No  | No  | No  | No  |
| Yes | No  | No  | No  | No  |
| No  | No  | Yes | Yes | No  |
| No  | No  | No  | Yes | No  |
| No  | No  | No  | Yes | No  |
| Yes | Yes | No  | Yes | No  |
| No  | No  | No  | No  | No  |
| Yes | Yes | Yes | Yes | Yes |
| Yes | Yes | Yes | Yes | No  |
| Yes | Yes | Yes | Yes | No  |
| Yes | Yes | Yes | Yes | Yes |
| Yes | Yes | Yes | No  | No  |
| Yes | Yes | No  | Yes | No  |
| No  | No  | No  | Yes | No  |
| No  | No  | No  | Yes | No  |
| Yes | Yes | Yes | Yes | No  |
| Yes | Yes | No  | No  | No  |
| Yes | Yes | No  | No  | No  |
| Yes | Yes | No  | No  | No  |
| No  | No  | No  | No  | No  |
| Yes | Yes | Yes | Yes | No  |
| Yes | Yes | No  | No  | No  |
| Yes | Yes | Yes | Yes | No  |
| Yes | Yes | Yes | Yes | No  |
| No  | No  | No  | Yes | No  |
| No  | No  | No  | Yes | No  |
| Yes | Yes | Yes | Yes | Yes |
| Yes | Yes | Yes | Yes | No  |
| No  | No  | No  | Yes | No  |
| No  | No  | No  | Yes | No  |
| No  | No  | No  | Yes | No  |
| No  | No  | No  | Yes | No  |
| No  | No  | No  | Yes | No  |
| Yes | Yes | Yes | Yes | Yes |
| Yes | Yes | Yes | Yes | No  |
| No  | Yes | No  | No  | No  |
| No  | Yes | No  | No  | No  |
| Yes | Yes | Yes | Yes | Yes |
| Yes | Yes | Yes | Yes | No  |
| No  | No  | No  | Yes | No  |

|     |     |     |     |     |
|-----|-----|-----|-----|-----|
| Yes | Yes | Yes | Yes | Yes |
| Yes | Yes | Yes | Yes | No  |
| Yes | Yes | Yes | Yes | Yes |
| Yes | Yes | No  | No  | No  |
| Yes | Yes | No  | Yes | No  |
| No  | No  | No  | Yes | No  |
| Yes | Yes | No  | No  | No  |
| Yes | Yes | Yes | No  | No  |
| Yes | No  | Yes | No  | No  |
| No  | No  | No  | No  | No  |
| Yes | Yes | Yes | Yes | No  |
| No  | No  | No  | Yes | No  |
| Yes | Yes | Yes | Yes | No  |
| No  | No  | Yes | Yes | No  |
| Yes | Yes | Yes | Yes | No  |
| Yes | Yes | Yes | Yes | No  |
| Yes | Yes | Yes | Yes | No  |
| Yes | Yes | Yes | Yes | No  |
| Yes | Yes | Yes | Yes | Yes |
| No  | No  | No  | Yes | No  |
| No  | No  | No  | Yes | No  |
| No  | No  | No  | Yes | No  |
| No  | No  | No  | No  | No  |
| Yes | Yes | No  | No  | No  |
| No  | No  | No  | No  | No  |
| No  | No  | No  | No  | No  |
| Yes | Yes | No  | No  | No  |
| No  | No  | No  | No  | No  |
| Yes | No  | No  | No  | No  |
| No  | No  | No  | No  | No  |
| Yes | Yes | No  | No  | No  |
| Yes | Yes | Yes | Yes | Yes |
| Yes | Yes | Yes | Yes | Yes |
| No  | No  | No  | No  | No  |
| No  | Yes | No  | No  | No  |
| Yes | Yes | Yes | Yes | Yes |
| No  | No  | No  | No  | No  |
| No  | No  | No  | No  | No  |
| Yes | Yes | Yes | Yes | No  |
| No  | No  | No  | Yes | No  |
| No  | No  | No  | Yes | No  |
| Yes | Yes | Yes | Yes | No  |
| Yes | Yes | No  | No  | No  |
| No  | No  | No  | Yes | No  |
| No  | No  | No  | No  | No  |
| Yes | Yes | Yes | Yes | Yes |
| Yes | Yes | Yes | Yes | Yes |
| Yes | Yes | Yes | Yes | Yes |
| Yes | Yes | Yes | No  | No  |

|     |     |     |     |     |
|-----|-----|-----|-----|-----|
| Yes | Yes | No  | No  | No  |
| Yes | Yes | Yes | Yes | Yes |
| No  | No  | No  | Yes | No  |
| Yes | Yes | Yes | Yes | Yes |
| No  | No  | No  | No  | No  |
| Yes | Yes | No  | Yes | No  |
| No  | Yes | Yes | Yes | No  |
| Yes | Yes | No  | No  | No  |
| Yes | Yes | Yes | Yes | No  |
| Yes | Yes | Yes | Yes | No  |
| Yes | Yes | Yes | Yes | No  |
| Yes | Yes | No  | No  | No  |
| No  | No  | No  | Yes | No  |
| No  | No  | No  | Yes | No  |
| Yes | Yes | No  | Yes | No  |
| No  | No  | No  | Yes | No  |
| No  | No  | No  | Yes | No  |
| No  | No  | No  | No  | No  |
| No  | No  | No  | No  | No  |
| No  | No  | No  | Yes | No  |
| No  | Yes | Yes | Yes | No  |
| No  | No  | No  | Yes | No  |
| No  | No  | No  | Yes | No  |
| Yes | Yes | No  | No  | No  |
| No  | No  | No  | Yes | No  |
| Yes | Yes | No  | No  | No  |
| Yes | Yes | Yes | Yes | No  |
| Yes | Yes | Yes | No  | No  |
| Yes | Yes | Yes | No  | No  |
| No  | No  | Yes | No  | No  |
| No  | No  | Yes | No  | No  |
| No  | No  | No  | Yes | No  |
| No  | No  | No  | Yes | No  |
| No  | No  | No  | Yes | No  |
| No  | No  | No  | Yes | No  |
| Yes | Yes | Yes | Yes | No  |
| No  | No  | No  | Yes | No  |
| Yes | Yes | Yes | Yes | No  |
| No  | No  | No  | Yes | No  |
| No  | No  | No  | Yes | No  |
| Yes | Yes | Yes | Yes | Yes |
| Yes | Yes | Yes | Yes | No  |
| No  | No  | Yes | Yes | No  |
| Yes | Yes | No  | No  | No  |
| No  | Yes | No  | No  | No  |



|     |     |     |     |     |
|-----|-----|-----|-----|-----|
| No  | No  | No  | Yes | No  |
| Yes | No  | No  | No  | No  |
| Yes | Yes | No  | No  | No  |
| No  | No  | No  | Yes | No  |
| Yes | Yes | No  | Yes | Yes |
| Yes | Yes | No  | No  | No  |
| No  | No  | No  | Yes | No  |
| No  | Yes | No  | No  | No  |
| No  | No  | Yes | No  | No  |
| Yes | Yes | Yes | No  | No  |
| Yes | Yes | No  | No  | No  |
| Yes | Yes | Yes | Yes | Yes |
| Yes | Yes | Yes | No  | No  |
| Yes | Yes | No  | No  | No  |
| Yes | Yes | No  | Yes | No  |
| Yes | Yes | Yes | Yes | Yes |
| Yes | Yes | No  | Yes | No  |
| Yes | Yes | No  | No  | No  |
| Yes | Yes | Yes | Yes | No  |
| No  | No  | No  | Yes | No  |
| No  | Yes | No  | No  | No  |
| Yes | Yes | No  | Yes | No  |
| Yes | Yes | No  | No  | No  |
| Yes | Yes | No  | No  | No  |
| No  | No  | No  | Yes | No  |
| Yes | Yes | Yes | Yes | Yes |
| No  | No  | Yes | No  | No  |
| Yes | Yes | No  | No  | No  |
| Yes | Yes | No  | No  | No  |
| No  | No  | No  | No  | No  |
| Yes | Yes | Yes | Yes | Yes |
| Yes | Yes | No  | No  | No  |
| No  | No  | No  | Yes | No  |
| Yes | Yes | No  | No  | No  |
| No  | No  | No  | No  | No  |
| Yes | Yes | Yes | Yes | No  |
| Yes | Yes | Yes | No  | No  |
| Yes | Yes | No  | No  | No  |
| No  | No  | No  | Yes | No  |
| Yes | Yes | No  | No  | No  |
| No  | No  | No  | Yes | No  |
| No  | No  | No  | Yes | No  |

|     |     |     |     |     |
|-----|-----|-----|-----|-----|
| No  | No  | No  | No  | No  |
| No  | No  | No  | Yes | No  |
| No  | No  | No  | Yes | No  |
| Yes | Yes | Yes | Yes | Yes |
| Yes | Yes | Yes | Yes | Yes |
| No  | No  | No  | No  | No  |
| No  | No  | No  | Yes | No  |
| Yes | Yes | No  | No  | No  |
| No  | Yes | No  | No  | No  |
| Yes | Yes | Yes | Yes | Yes |
| No  | No  | No  | No  | No  |
| No  | Yes | No  | Yes | No  |
| No  | No  | No  | Yes | No  |
| No  | No  | No  | No  | No  |
| No  | No  | No  | No  | No  |
| Yes | Yes | No  | No  | No  |
| No  | No  | No  | No  | No  |
| No  | No  | Yes | Yes | No  |
| Yes | Yes | No  | No  | No  |
| Yes | Yes | No  | No  | No  |
| Yes | Yes | No  | No  | No  |
| No  | No  | Yes | No  | No  |
| Yes | Yes | No  | No  | No  |
| Yes | Yes | Yes | Yes | No  |
| Yes | Yes | No  | Yes | No  |
| Yes | Yes | Yes | Yes | No  |
| Yes | Yes | Yes | Yes | No  |
| Yes | Yes | Yes | No  | No  |
| Yes | Yes | Yes | No  | No  |
| Yes | Yes | Yes | No  | No  |
| Yes | Yes | Yes | No  | No  |
| Yes | Yes | Yes | No  | No  |
| Yes | Yes | Yes | No  | No  |
| Yes | Yes | Yes | No  | No  |
| Yes | Yes | Yes | Yes | No  |
| No  | No  | No  | Yes | No  |
| No  | No  | No  | No  | No  |
| No  | No  | No  | Yes | No  |
| Yes | Yes | Yes | Yes | No  |
| Yes | Yes | No  | No  | No  |
| Yes | Yes | No  | Yes | No  |
| No  | No  | No  | No  | No  |
| Yes | Yes | Yes | Yes | No  |
| Yes | Yes | No  | No  | No  |
| Yes | Yes | No  | No  | No  |
| Yes | Yes | No  | Yes | No  |
| No  | No  | No  | Yes | No  |
| Yes | Yes | Yes | Yes | Yes |
| Yes | Yes | No  | No  | No  |
| Yes | Yes | No  | No  | No  |
| Yes | Yes | No  | Yes | No  |
| No  | No  | No  | Yes | No  |
| Yes | Yes | Yes | Yes | No  |

|     |     |     |     |     |
|-----|-----|-----|-----|-----|
| Yes | Yes | No  | No  | No  |
| No  | No  | No  | No  | No  |
| No  | No  | No  | Yes | No  |
| No  | No  | No  | Yes | No  |
| Yes | Yes | Yes | Yes | Yes |
| No  | Yes | No  | No  | No  |
| Yes | Yes | Yes | Yes | No  |
| No  | No  | No  | No  | No  |
| No  | No  | No  | Yes | No  |
| No  | No  | No  | No  | No  |
| No  | No  | No  | Yes | No  |
| Yes | Yes | No  | No  | No  |
| Yes | Yes | No  | No  | No  |
| Yes | Yes | Yes | Yes | No  |
| Yes | Yes | No  | No  | No  |
| Yes | Yes | No  | No  | No  |
| Yes | Yes | No  | No  | No  |
| No  | No  | Yes | No  | No  |
| No  | No  | No  | No  | No  |
| Yes | Yes | No  | No  | No  |
| Yes | Yes | No  | Yes | Yes |
| No  | Yes | No  | Yes | No  |
| No  | No  | No  | Yes | No  |
| Yes | Yes | No  | No  | No  |
| Yes | Yes | No  | No  | No  |
| Yes | Yes | No  | No  | No  |
| Yes | Yes | No  | No  | No  |
| Yes | Yes | No  | No  | No  |
| Yes | Yes | Yes | Yes | No  |
| Yes | Yes | Yes | Yes | No  |
| No  | No  | No  | Yes | No  |
| No  | No  | No  | Yes | No  |
| No  | No  | No  | Yes | No  |
| No  | No  | No  | Yes | No  |
| No  | No  | No  | Yes | No  |
| Yes | No  | No  | No  | No  |
| Yes | No  | No  | No  | No  |
| Yes | Yes | No  | No  | No  |
| Yes | Yes | No  | No  | No  |
| Yes | Yes | No  | No  | No  |
| No  | No  | No  | Yes | No  |
| No  | Yes | No  | Yes | Yes |
| No  | Yes | No  | No  | No  |
| No  | Yes | No  | No  | No  |
| Yes | Yes | Yes | Yes | Yes |
| No  | Yes | No  | No  | No  |
| No  | Yes | No  | No  | No  |
| No  | Yes | No  | No  | No  |

|     |     |     |     |     |
|-----|-----|-----|-----|-----|
| No  | Yes | No  | No  | No  |
| No  | Yes | No  | No  | No  |
| Yes | Yes | No  | No  | No  |
| No  | Yes | No  | No  | No  |
| Yes | Yes | Yes | Yes | Yes |
| No  | No  | No  | No  | No  |
| No  | No  | No  | No  | No  |
| No  | No  | No  | No  | No  |
| No  | No  | No  | No  | No  |
| No  | Yes | Yes | Yes | No  |
| Yes | Yes | No  | No  | No  |
| Yes | Yes | No  | No  | No  |
| No  | No  | No  | Yes | No  |
| Yes | Yes | No  | No  | No  |
| Yes | Yes | No  | No  | No  |
| No  | No  | No  | Yes | No  |
| No  | No  | Yes | No  | No  |
| No  | No  | No  | No  | No  |
| Yes | No  | No  | No  | No  |
| Yes | Yes | No  | No  | No  |
| Yes | Yes | Yes | Yes | Yes |
| Yes | Yes | No  | No  | No  |
| Yes | Yes | Yes | Yes | Yes |
| Yes | Yes | No  | No  | No  |
| Yes | No  | No  | No  | No  |
| No  | Yes | No  | Yes | No  |
| No  | Yes | No  | Yes | No  |
| No  | Yes | No  | No  | No  |
| Yes | Yes | Yes | Yes | Yes |
| Yes | Yes | No  | No  | No  |
| No  | No  | Yes | No  | No  |
| No  | No  | No  | No  | No  |
| No  | No  | No  | Yes | No  |
| Yes | Yes | Yes | Yes | Yes |
| No  | No  | No  | Yes | No  |
| No  | No  | No  | Yes | No  |
| Yes | Yes | No  | No  | No  |
| No  | No  | No  | Yes | No  |
| Yes | Yes | No  | No  | No  |
| Yes | Yes | Yes | Yes | No  |
| Yes | Yes | Yes | No  | Yes |
| No  | Yes | No  | Yes | No  |
| Yes | Yes | Yes | No  | No  |
| Yes | Yes | Yes | Yes | No  |
| Yes | Yes | No  | Yes | Yes |
| Yes | No  | No  | No  | No  |
| Yes | Yes | Yes | Yes | No  |
| Yes | Yes | No  | Yes | Yes |
| No  | No  | No  | Yes | No  |

|     |     |     |     |     |
|-----|-----|-----|-----|-----|
| No  | No  | No  | Yes | No  |
| No  | No  | No  | No  | No  |
| No  | No  | No  | Yes | No  |
| No  | No  | No  | Yes | No  |
| No  | No  | No  | Yes | No  |
| No  | Yes | No  | No  | No  |
| Yes | Yes | Yes | Yes | Yes |
| No  | No  | No  | No  | No  |
| No  | No  | No  | No  | No  |
| Yes | Yes | Yes | Yes | No  |
| No  | No  | No  | Yes | No  |
| Yes | Yes | No  | Yes | No  |
| Yes | Yes | No  | Yes | No  |
| No  | Yes | No  | Yes | No  |
| No  | No  | No  | No  | No  |
| Yes | Yes | Yes | Yes | Yes |
| Yes | Yes | No  | No  | No  |
| Yes | Yes | No  | No  | No  |
| No  | No  | No  | No  | No  |
| Yes | Yes | Yes | Yes | No  |
| Yes | Yes | No  | Yes | No  |
| Yes | Yes | Yes | Yes | No  |
| No  | No  | No  | Yes | No  |
| No  | No  | No  | Yes | No  |
| No  | No  | No  | Yes | No  |
| No  | No  | No  | Yes | No  |
| Yes | Yes | No  | No  | No  |
| Yes | Yes | No  | No  | No  |
| No  | Yes | No  | Yes | No  |
| Yes | Yes | No  | Yes | No  |
| Yes | Yes | Yes | Yes | Yes |
| No  | Yes | No  | No  | No  |
| No  | No  | No  | Yes | No  |
| No  | No  | No  | No  | No  |
| No  | No  | No  | Yes | No  |
| No  | No  | No  | Yes | No  |
| No  | No  | No  | Yes | No  |
| Yes | Yes | No  | No  | No  |
| Yes | Yes | Yes | Yes | No  |
| No  | No  | Yes | No  | No  |
| No  | No  | No  | No  | No  |
| No  | No  | No  | No  | No  |

|     |     |     |     |     |
|-----|-----|-----|-----|-----|
| No  | No  | No  | No  | No  |
| No  | No  | No  | No  | No  |
| No  | No  | No  | Yes | No  |
| No  | No  | No  | Yes | No  |
| No  | No  | No  | Yes | No  |
| Yes | Yes | No  | No  | No  |
| No  | No  | No  | Yes | No  |
| Yes | Yes | Yes | Yes | No  |
| No  | No  | No  | Yes | No  |
| Yes | Yes | Yes | Yes | Yes |
| No  | No  | No  | Yes | No  |
| Yes | Yes | Yes | Yes | No  |
| No  | No  | No  | Yes | No  |
| Yes | Yes | No  | Yes | No  |
| Yes | Yes | Yes | Yes | Yes |
| Yes | Yes | No  | No  | No  |
| Yes | Yes | No  | Yes | No  |
| No  | No  | No  | Yes | No  |
| No  | No  | No  | Yes | No  |
| No  | No  | No  | No  | No  |
| No  | No  | No  | No  | No  |
| Yes | Yes | No  | Yes | No  |
| No  | Yes | No  | Yes | No  |
| No  | Yes | No  | Yes | No  |
| Yes | Yes | No  | No  | Yes |
| No  | No  | No  | No  | No  |
| No  | No  | No  | No  | No  |
| No  | No  | No  | No  | No  |
| No  | No  | No  | No  | No  |
| No  | No  | No  | No  | No  |
| No  | No  | No  | Yes | No  |
| Yes | No  | No  | No  | No  |
| No  | No  | No  | No  | No  |
| Yes | Yes | Yes | Yes | Yes |
| Yes | Yes | Yes | Yes | No  |
| Yes | Yes | No  | Yes | Yes |
| No  | No  | No  | Yes | No  |
| No  | No  | No  | Yes | No  |
| No  | Yes | No  | Yes | No  |
| No  | No  | Yes | No  | No  |
| Yes | Yes | Yes | Yes | Yes |
| Yes | Yes | Yes | Yes | No  |
| Yes | Yes | No  | No  | No  |
| No  | No  | No  | No  | No  |
| No  | No  | No  | Yes | No  |

|     |     |     |     |     |
|-----|-----|-----|-----|-----|
| Yes | Yes | Yes | Yes | No  |
| Yes | Yes | Yes | Yes | No  |
| No  | No  | No  | No  | No  |
| No  | No  | No  | No  | No  |
| Yes | Yes | Yes | Yes | Yes |
| Yes | Yes | No  | No  | No  |
| No  | Yes | No  | Yes | No  |
| Yes | Yes | No  | No  | No  |
| No  | No  | No  | No  | No  |
| No  | No  | No  | No  | No  |
| Yes | Yes | Yes | Yes | No  |
| Yes | Yes | Yes | No  | No  |
| Yes | Yes | No  | No  | No  |
| Yes | Yes | No  | No  | No  |
| No  | No  | No  | Yes | No  |
| No  | No  | No  | No  | No  |
| No  | No  | No  | No  | No  |
| No  | No  | No  | Yes | No  |
| No  | No  | No  | Yes | No  |
| No  | No  | No  | No  | No  |
| No  | Yes | No  | No  | No  |
| Yes | Yes | No  | No  | No  |
| No  | No  | No  | No  | No  |
| No  | No  | No  | Yes | No  |
| No  | No  | No  | Yes | No  |
| No  | No  | No  | Yes | No  |
| No  | No  | No  | Yes | No  |
| No  | No  | No  | No  | No  |
| No  | No  | No  | No  | No  |
| No  | No  | No  | No  | No  |
| No  | No  | No  | Yes | No  |
| No  | No  | No  | Yes | No  |
| No  | No  | Yes | Yes | No  |
| Yes | No  | No  | No  | No  |
| Yes | Yes | No  | Yes | No  |







Yes  
Yes  
No  
Yes  
Yes  
Yes  
Yes  
No  
Yes  
Yes  
Yes  
Yes  
Yes  
Yes  
Yes  
Yes  
Yes  
No  
Yes  
No  
Yes  
Yes  
Yes  
Yes  
No  
No  
Yes  
No  
No  
No  
No  
Yes  
Yes  
Yes  
No  
Yes  
Yes  
Yes  
Yes  
Yes  
Yes  
No  
No  
Yes  
Yes  
No  
Yes  
Yes  
Yes  
No  
Yes  
No  
Yes

No  
Yes  
No  
No  
Yes  
Yes  
No  
Yes  
No  
Yes  
Yes  
Yes  
Yes  
Yes  
Yes  
No  
No  
Yes  
Yes  
Yes  
Yes  
No  
Yes  
Yes  
Yes  
No  
No  
No  
No  
Yes  
Yes  
No  
No  
No  
No  
Yes  
Yes  
No  
Yes  
Yes  
No  
Yes  
Yes  
No  
Yes  
Yes  
Yes

No  
No  
Yes  
Yes  
Yes  
Yes  
No  
No  
No  
No  
No  
Yes  
Yes  
No  
Yes  
No  
No  
No  
No  
No  
No  
No  
Yes  
No  
No  
No  
Yes  
No  
No  
Yes  
Yes  
Yes  
No  
No  
Yes  
Yes  
Yes  
No  
No  
No  
No  
Yes  
No  
Yes  
No  
Yes  
No  
No  
No  
No  
No  
No  
No  
Yes



No  
No  
Yes  
Yes  
Yes  
Yes  
Yes  
Yes  
Yes  
Yes  
Yes  
No  
Yes  
Yes  
No  
No  
Yes  
No  
Yes  
Yes  
Yes  
Yes  
Yes  
No  
Yes  
Yes  
Yes  
No  
No  
No  
No  
No  
No  
Yes  
Yes  
Yes  
Yes  
No  
No  
No  
No  
No  
Yes  
No  
No  
Yes  
Yes  
No  
Yes  
Yes  
Yes  
Yes  
No











Yes  
No  
Yes  
No  
Yes  
Yes  
No  
No  
No  
Yes  
No  
Yes  
Yes  
Yes  
No  
No  
No  
Yes  
Yes  
Yes  
No  
Yes  
Yes  
Yes  
No  
Yes  
Yes  
Yes  
No  
Yes  
Yes  
Yes  
No  
No  
Yes  
Yes  
Yes  
No

No  
Yes  
Yes  
Yes  
Yes  
Yes  
Yes  
No  
Yes  
No  
Yes  
No  
Yes  
Yes  
No  
Yes  
Yes  
Yes  
Yes  
Yes  
No  
Yes  
Yes  
No  
No  
No  
No  
No  
No  
No  
Yes  
Yes  
Yes  
Yes  
Yes  
Yes  
Yes  
No  
No  
No  
Yes  
No  
No  
No  
Yes  
Yes  
Yes  
Yes  
Yes  
No  
No  
No

Yes  
No  
No  
No  
Yes  
Yes  
Yes  
No  
No  
No  
No  
Yes  
Yes  
No  
No  
No  
Yes  
Yes  
Yes  
Yes  
No  
No  
No  
Yes  
No  
Yes  
No  
Yes  
No  
No  
No  
Yes  
Yes  
Yes  
Yes  
Yes  
Yes  
Yes  
No  
No  
No  
Yes

No  
No  
Yes  
Yes  
Yes  
Yes  
No  
No  
No  
Yes  
Yes  
No  
No  
Yes  
Yes  
No  
Yes  
No  
Yes  
Yes  
No  
Yes  
No  
No  
Yes  
No  
Yes  
Yes  
Yes  
No  
No  
Yes  
No  
Yes  
Yes  
Yes  
No  
No  
Yes  
No  
No  
Yes  
Yes  
Yes  
No  
No  
Yes  
No  
Yes  
Yes  
No

No  
Yes  
Yes  
No  
Yes  
No  
Yes  
Yes  
Yes  
Yes  
Yes  
No  
No  
No  
No  
No  
No  
Yes  
Yes  
No  
Yes  
Yes  
No  
No  
No  
No  
No  
Yes  
No  
Yes  
No  
Yes  
Yes  
Yes  
Yes  
Yes  
Yes  
No  
Yes  
Yes  
No  
No  
Yes  
No  
No  
No

No  
No  
No  
No  
Yes  
Yes  
No  
No  
Yes  
No  
Yes  
No  
Yes  
No  
No  
Yes  
Yes  
Yes  
No  
No  
Yes  
Yes  
Yes  
Yes  
No  
No  
No  
Yes  
No  
No  
No  
No  
No  
Yes  
No  
No  
Yes  
Yes  
No  
No  
Yes  
Yes  
Yes



Yes  
Yes  
Yes  
Yes  
Yes  
No  
Yes  
No  
No  
Yes  
No  
No  
Yes  
Yes  
Yes  
Yes  
No  
No  
Yes  
Yes  
Yes  
Yes  
No  
Yes  
Yes  
Yes  
Yes  
Yes  
No  
No  
No  
No  
Yes  
Yes  
Yes  
No  
Yes  
Yes  
No  
No  
No  
Yes  
No  
No  
No

No  
No  
No  
Yes  
Yes  
Yes  
No  
Yes  
No  
Yes  
No  
Yes  
Yes  
Yes  
Yes  
No  
Yes  
Yes  
Yes  
Yes  
Yes  
No  
No  
No  
Yes  
Yes  
Yes  
Yes  
Yes  
Yes  
No  
Yes  
Yes  
Yes  
Yes  
Yes  
No  
No  
No  
No  
Yes  
No  
Yes  
No  
Yes  
Yes  
No  
No  
No  
Yes  
No  
Yes  
No

Yes  
Yes  
Yes  
Yes  
Yes  
Yes  
No  
No  
Yes  
Yes  
Yes  
No  
No  
No  
No  
Yes  
No  
No  
Yes  
No  
Yes  
No  
No  
No  
Yes  
Yes  
Yes  
Yes  
Yes  
No  
No  
Yes
