# Supplementary material for: Inflation of tumor mutation burden by tumor-only sequencing in under-represented groups
Source: PubMed Central journal article supplement (PMC7979755; doi:10.1038/s41698-021-00164-5), 2021-03-19
Supplement: 41698_2021_164_MOESM2_ESM.pdf [file 41698_2021_164_MOESM2_ESM.pdf]

See "EXAMPLE" tab which gives an example of a c

**README: Complete one row for each dataset supporting the figures, tables and results reported in your manuscript**

**Datasets supporting your figures**

Data supporting Figure 1

Data supporting Figure 2

**Datasets supporting your tables**

Data supporting Table 1

**Datasets included in your supplementary information files**

Data supporting supplementary file 2

**Other datasets generated as part of this study**

You may find it useful to check the subheadings of your Results and Methods s

(add rows as necessary)

|                               |  |  |
|-------------------------------|--|--|
| <b>Completed summary form</b> |  |  |
|-------------------------------|--|--|

|                          |                                                                                                             |                                                    |
|--------------------------|-------------------------------------------------------------------------------------------------------------|----------------------------------------------------|
| <b>Data file name(s)</b> | <b>Data file format &amp; file type</b> (of data <i>supporting</i> Figures, etc; not of Figures themselves) | <b>Location of data file(s) or repository name</b> |
|--------------------------|-------------------------------------------------------------------------------------------------------------|----------------------------------------------------|

|                                                     |       |                            |
|-----------------------------------------------------|-------|----------------------------|
| Supporting_Data, worksheets "Fig 1a+2" and "Fig 1b" | excel | Institutional file storage |
|-----------------------------------------------------|-------|----------------------------|

|                                       |       |                            |
|---------------------------------------|-------|----------------------------|
| Supporting_Data, worksheet "Fig 1a+2" | excel | Institutional file storage |
|---------------------------------------|-------|----------------------------|

|                                       |       |                            |
|---------------------------------------|-------|----------------------------|
| Supporting_Data, worksheet "Fig 1a+2" | excel | Institutional file storage |
|---------------------------------------|-------|----------------------------|

|                                                                                                               |       |                            |
|---------------------------------------------------------------------------------------------------------------|-------|----------------------------|
| Supporting_Data, worksheets "Supplementary Figure 2" , "Supplementary Figure 3-a", "Supplementary Figure 3-b" | excel | Institutional file storage |
|---------------------------------------------------------------------------------------------------------------|-------|----------------------------|

|                                                                    |  |  |
|--------------------------------------------------------------------|--|--|
| actions as these often align with data underlying your manuscript. |  |  |
|                                                                    |  |  |
|                                                                    |  |  |
|                                                                    |  |  |

If the dataset is in a repository,  
enter the accession number, DOI  
or link to the dataset

|  |
|--|
|  |
|  |

|  |
|--|
|  |
|--|

|  |
|--|
|  |
|--|

|  |
|--|
|  |
|  |
|  |
|  |

**How the data file will be accessible by other researchers after your manuscript has been published**

Available from npj Precision Oncology

**If applicable, please explain why the dataset will not be publicly available** (note: *npj Precision Oncology* strongly encourages data sharing)

|                                                                                                                                                                                                                            |
|----------------------------------------------------------------------------------------------------------------------------------------------------------------------------------------------------------------------------|
|                                                                                                                                                                                                                            |
| <b>Would you like to publish these files for free in the journal repository? Yes/No</b><br><a href="https://springernature.figshare.com/npjprecisiononcology">https://springernature.figshare.com/npjprecisiononcology</a> |
| Yes                                                                                                                                                                                                                        |
| Yes                                                                                                                                                                                                                        |
| Yes                                                                                                                                                                                                                        |
| Yes                                                                                                                                                                                                                        |
|                                                                                                                                                                                                                            |
|                                                                                                                                                                                                                            |
|                                                                                                                                                                                                                            |
|                                                                                                                                                                                                                            |
